# Supplementary material
Source: publisher figshare collection journal article supplement (https://acs.figshare.com/ndownloader/files/26766901)
Supplement: Supplementary file 1 [file 26766901]

**Combine NMR-based metabolic profiling and genome mining for the accelerated discovery of archangiumide, an allenic macrolide from the myxobacterium *Archangium violaceum* SDU8**

Jia-Qi Hu <sup>1,a</sup>, Jing-Jing Wang <sup>1,a</sup>, Yue-Lan Li <sup>a</sup>, Li Zhuo <sup>a</sup>, Ai Zhang <sup>b</sup>, Haiyan Sui <sup>a</sup>, Xiaojun Li <sup>a</sup>, Tao Shen <sup>c</sup>, Yizhen Yin <sup>a</sup>, Zhi-Hong Wu <sup>a</sup>, Wei Hu <sup>a</sup>, Yue-Zhong Li <sup>a,\*</sup>, Changsheng Wu <sup>a,\*</sup>

<sup>a</sup> State Key Laboratory of Microbial Technology, Institute of Microbial Technology, Shandong University, Qingdao, P.R. China

<sup>b</sup> Fetal Medicine Center, Qingdao Women and Children's Hospital, Qingdao University, Qingdao, P.R. China

<sup>c</sup> Key Lab of Chemical Biology (MOE), School of Pharmaceutical Sciences, Shandong University, Jinan, PR China

\* Corresponding authors:

wuchangsheng@sdu.edu.cn; Tel. (+86) 532-58631538; ORCID ID 0000-0003-1310-0089.

lilab@sdu.edu.cn; Tel. (+86) 532 58631539; Fax. (+86) 532 58631539; ORCID ID, 0000-0001-8336-6638.

<sup>1</sup> These authors contributed equally to this work

## EXPERIMENTAL SECTION

### General experimental procedures.

NMR spectra were recorded in CD<sub>3</sub>OD or DMSO-*d*<sub>6</sub> on a Bruker AVNEO 600 MHz or 500 MHz calibrated on the residual of deuterated solvent. The HR-Q-ToF-ESI-MS analysis was performed on a rapid separation liquid chromatography system (Dionex, UltiMate3000, UHPLC) coupled with an ESI-Q-ToF mass spectrometer (Bruker Daltonics, Impact HD). HPLC analysis (210 nm, 254 nm, 280 nm and 365 nm) was performed with an Agilent 1260 series HPLC apparatus (Agilent technologies Inc., Santa Clara, CA, U.S.A.), using a 250 × 4.6 mm Luna 5 μm C<sub>18</sub> (2) 100 Å column equipped with a guard column containing C<sub>18</sub> 4 × 3 mm cartridges (Phenomenex Inc., Torrance, CA, U.S.A.). Semi-preparative HPLC separation was performed on a reversed-phase column (Phenomenex Luna 5 μm C<sub>18</sub> (2) 100 Å column, 250 × 10 mm). HR-Q-ToF-ESI-MS instrument was equipped with a C<sub>18</sub> column (Thermo Fisher Scientific, C<sub>18</sub>, 250 × 4.6 mm, 5 μm). TLC analysis was developed by precoated silica gel GF<sub>254</sub> (Qingdao Haiyang Chemical Co., Ltd., Qingdao, China). The expansion of the compound was conducted by using a solvent system of CHCl<sub>2</sub>/MeOH (18:1), and then visualized with iodine and anisaldehyde/sulfuric acid, respectively. According to the experiments, all organic solvents and chemicals were of analytical or HPLC grade.

### Isolation and identification of the myxobacterium *Archangium violaceum* SDU8

The bacterial strain, designated SDU8, was isolated from an upper soil sample, which was collected from Qingdao campus garden of Shandong University, Shandong Province, P.R. China. To isolate myxobacteria, the soil sample was air-dried for one month before enrichment procedure to reduce the contamination of other bacteria and fungi. Air-dried soil was spread over cell mats of living *Escherichia coli* smeared on WCX basal medium (0.1% CaCl<sub>2</sub>·2H<sub>2</sub>O, 25 μg/mL cycloheximide and 1.5% agar, w/v), which is a classical technique for the enrichment of myxobacteria.<sup>1</sup> The isolate was transferred from the colony edge onto fresh VY/2 medium agar plates (DSMZ medium 9) several times for purification. The purified strain SDU8 had a typical morphological feature of genus *Archangium*, for example, the swarm colonies exhibited branched

radial veins with reddish to violet pigmentation. The full-length 16S rRNA gene sequence (1536 bp; under the GenBank accession number MT860702) was retrieved from the genome of strain SDU8. Phylogenetic analysis based on the 16S rRNA gene sequences showed that SDU8 was closest to the strains *Archangium violaceum* DSM 14727<sup>T</sup> and *Archangium gephyra* DSM 2260<sup>T</sup> with similarity of 98.9% and 98.8% (Figure S14), respectively. Consequently, we concluded that SDU8 was affiliated with the species *Archangium violaceum*.

### **Culturing conditions and fermentation.**

The myxobacterium *Archangium violaceum* SDU8 had a characteristic colony status when grown on the VY/2 medium containing (L<sup>-1</sup>) 5 g baker's yeast, 1 g CaCl<sub>2</sub>, 0.5 mg VB<sub>12</sub>, 15 g agar, and 1.97 g 4-(2-hydroxyethyl)-1-piperazineethanesulfonic acid (HEPES), at pH 7.2. The strain was first activated on VY/2 agar plate for 3 days at 30 °C. Mycelium of the colony was inoculated into 100 mL of sterile liquid VY/2 medium in Erlenmeyer flasks (300 mL), which were continuously shaken at 200 rpm, 30 °C for 3 days. For fermentation, the 100 mL of seed culture was equally divided into three parts and then transferred into fresh liquid VY/2 medium in Erlenmeyer flasks (300 mL), and then continuously shook at 200 rpm, 30 °C for 7 days.

### **Metabolomics**

To compare different extraction methods, six flasks of SDU8 were fermented for metabolomics research. After fermentation, all the cultures were centrifuged to remove the pellets. Three portions of the supernatants were adsorbed with 2 g of HP-20 resin (Shanghai Yuanye Biological Technology Co., Ltd., Shanghai, China) overnight. After filtration to remove the supernatant, the resin was rinsed with 5% methanol in water, and the adsorbed compounds were recovered with 100% methanol, followed by evaporation under vacuum at 40 °C. The recovered crude extracts were lyophilized and then re-dissolved in 0.5 mL of 50% CD<sub>3</sub>OD in D<sub>2</sub>O for NMR analysis. The other three portions of SDU8 were extracted with 100 mL of ethyl acetate (EtOAc) in funnel. The

following methods for compounds recovery and NMR analysis were same with those for HP-20 extraction.

### **NMR measurement and data analysis**

Suppression methods were applied to remove the undesired signal caused by residual water. The  $^1\text{H}$  NMR spectrum was acquired by Bruker AVNEO 600 MHz (Bruker technologies Inc., Karlsruhe, Germany) at 25 °C. Manual shimming and tuning generally took over 20 min on the first sample, using the corresponding deuterated reagent as internal lock. Each  $^1\text{H}$  NMR spectrum consisted of 16 scans using the following parameters: 0.18 Hz/point, spectral width (SW) = 20 ppm, free induction decays resolution = 0.36 Hz, dwell time (DW) = 42  $\mu\text{s}$  and pre-scan delay (DE) = 22  $\mu\text{s}$ .  $^{13}\text{C}$  NMR spectrum was measured with 256 scans using the following parameters: 0.54 Hz/point, spectral width (SW) = 237 ppm, free induction decays resolution = 1.09 Hz, dwell time (DW) = 14  $\mu\text{s}$  and pre-scan delay (DE) = 18  $\mu\text{s}$ . COSY required 2 scans, and obtained 16 dummy scans. The other parameters: spectral width (SW) = 20 ppm, free induction decays resolution = 12 Hz (F2) / 47 Hz (F1), dwell time (DW) = 42  $\mu\text{s}$ , pre-scan delay (DE) = 22  $\mu\text{s}$  and decimation rate of digital filter = 1680. HSQC achieved 24 scans. The other parameters: spectral width (SW) = 8 (F2) / 220 (F1) ppm, free induction decays resolution = 10 Hz (F2) / 130 Hz (F1), dwell time (DW) = 95  $\mu\text{s}$ , pre-scan delay (DE) = 6.5  $\mu\text{s}$  and decimation rate of digital filter = 3800. HMBC achieved 32 scans. The other parameters: spectral width (SW) = 20 (F2) / 240 (F1) ppm, free induction decays resolution = 6 Hz (F2) / 71 Hz (F1), dwell time (DW) = 42  $\mu\text{s}$ , pre-scan delay (DE) = 6.5  $\mu\text{s}$  and decimation rate of digital filter = 1680. NOESY required 32 scans, and obtained 4 dummy scans. The other parameters: spectral width (SW) = 20 ppm, free induction decays resolution = 0.38 Hz, dwell time (DW) = 40  $\mu\text{s}$ , pre-scan delay (DE) = 6.5  $\mu\text{s}$  and decimation rate of digital filter = 1600. The one-dimensional and two-dimensional NMR spectra were manually phased and baseline corrected by MestReNova (version 6.1.0, Mestrelab Research), and calibrated on the residual of the deuterated  $\text{CD}_3\text{OD}$  (3.31 ppm), or  $\text{DMSO}-d_6$  (2.50 ppm).

## Compound isolation

To purify the target compound revealed by metabolomics study, the ethyl acetate extraction of the 20 L of SDU8 fermentation was concentrated by rotary evaporation at 40 °C under vacuum. The resulting residue (1.42 g) dissolved in MeOH was applied to Sephadex LH-20 (GE Healthcare Bio-Sciences Inc., Uppsala, Sweden) with CH<sub>2</sub>Cl<sub>2</sub>–MeOH (2:1) to afford 11 fractions (FrA–FrK). All the obtained fractions were subjected to <sup>1</sup>H NMR and TLC analysis, the fraction H and I containing the signals of track were combined. The resultant mixture (0.977 g) was further separated by reverse phase preparative medium-pressure liquid chromatography (RP–MPLC) on an irregular C<sub>18</sub> column connected to a Buchi labortechnik AG chromatography system (Buchi, Flawil, Japan) to generate 98 fractions (Fr1–Fr98), eluting with solvent system [solvent A: H<sub>2</sub>O; solvent B: methanol; gradient: 10% B to 100% B]. Subsequently, four fractions (Fr31–Fr34) containing targeted compound based on TLC analysis were combined and further purified by semi-preparative RP-HPLC [column: Phenomenex Luna 5 μm C<sub>18</sub> (2) 100 Å, 250 × 10 mm; solvent A: H<sub>2</sub>O; solvent B: ACN; gradient: 40% B to 60% B in 30 min; flow rate 1.8 mL/min; 30 °C; UV detection at 210 nm], to afford **1** (20.5 mg).

*Archangiumide (1)*: white powder, needle crystals (MeOH); [ $\alpha$ ]<sub>D</sub><sup>25</sup> +37.0 (c 0.05, MeOH); [ $\theta$ ]<sub>D</sub><sup>25</sup>(nm) (MeOH) –66153 (201), 41177 (228), –32576 (252); IR  $\nu_{\max}$  3375, 2928, 1942, 1717, 1442, 1263, 1118, 1076, 1040, 1027, 962, 881 cm<sup>–1</sup>; <sup>1</sup>H NMR (500 MHz, DMSO-*d*<sub>6</sub>) and <sup>13</sup>C NMR (125 MHz, DMSO-*d*<sub>6</sub>) data were showed in [Table 1](#); HRMS (ESI) *m/z*: [M + H]<sup>+</sup> Calcd for C<sub>19</sub>H<sub>27</sub>O<sub>6</sub> 351.1802; Found 351.1797.

## Bioassays

*Antimicrobial activity*: agar diffusion assay followed our previous method.<sup>2</sup> Single colony of Gram-positive bacteria *Staphylococcus aureus* and *Bacillus subtilis*, gram-negative bacterium *Escherichia coli*, and fungus *Candida albicans* were picked and inoculated into 8 mL of LB liquid medium for overnight growth at 37 °C, respectively. Next day, the cultures were then 100-fold diluted to 1×10<sup>7</sup> CFU/mL with fresh LB liquid medium, to grow at 37 °C until OD<sub>600</sub> 0.4~0.6.

Archangiumide was dissolved in methanol (2 mg/mL), and 20  $\mu$ L of the solution was applied on a paper disk. The disks were then placed onto an agar plate containing a soft agar overlay with the microorganisms. Kanamycin (for *S. aureus* and *B. subtilis*) and apramycin (for *C. albicans* and *E. coli*) at a concentration of 1 mg/mL were used as positive controls, and the solvent methanol as the negative control. After incubation at 37 °C for 18 h, archangiumide did not give any growth inhibition zones (in mm) against the tested strains.

*Anti-cancer assay:* archangiumide was assayed against the human breast cancer cell line MCF-7, liver carcinoma cell line HepG2 and hepatocyte cell line HL-7702 using the MTT colorimetric assay.<sup>3</sup> Fresh cell suspensions in the logarithmic growth phase were seeded in a 96-well microtiter plate. The newly attached cells were treated with varying concentrations of drugs by dilution from 100  $\mu$ g/mL to 0.1  $\mu$ g/mL (dissolved in DMSO). After 48 h of incubation with the test compounds, the cultures were treated with MTT (2 mg/mL) solution prepared in the growth medium. The cells were incubated for an additional 4 h at 37°C until a purple precipitate was visible. The purple formazan crystals were dissolved with DMSO, and the absorbance of each sample was measured at 492 nm using the microplate reader. For all the MTT assay experiments, triplicates were conducted, and taxol was used as the positive control. IC<sub>50</sub> values were calculated using GraphPad Prism software (Version 6.01), and IC<sub>50</sub> > 100  $\mu$ g/mL was regarded as inactive.

*DPPH radical-scavenging assay:* the method for  $\alpha$ ,  $\alpha$ -diphenyl- $\beta$ -picrylhydrazyl (DPPH) free radical scavenging was performed according to the protocol of manufacturer (kit BC4750, Solarbio). In brief, 0.4 mg/mL of archangiumide was reacted with DPPH for 30 minutes at room temperature in the dark. The absorbance (A) of the resulting solution was measured at 515 nm with a UV spectrophotometer. Vitamin C (0.4 mg/mL) was used as the positive control. DPPH radical-scavenging rate was calculated by the formula  $[D\% = (A_{\text{control}} - A_{\text{sample}})/A_{\text{control}}]$ ,<sup>4</sup> whereby an ignorable rate of < 5% was observed for archangiumide. The experiment was conducted in duplicate.

*Anti-inflammatory activity:* RAW 264.7 murine macrophages ( $8.0 \times 10^4$  cells/well) were seeded in a 96-well plate and treated with 1  $\mu$ g/mL of LPS, in the absence or presence of the tested

compound with a concentration gradient ranging from 0.1~50  $\mu\text{M}$ . After 24 h's incubation, 100  $\mu\text{L}$  of supernatant was removed to a new 96-well plate and mixed with 100  $\mu\text{L}$  of Griess reagent (0.1% naphthylethylenediamine and 1% sulfanilamide in 5%  $\text{H}_3\text{PO}_4$  solution) for 15 min. Absorbance was measured at 570 nm on the Model 680 plate reader (Bio-rad). Nitrite concentration was calculated from a  $\text{NaNO}_2$  standard curve. Didox (100  $\mu\text{M}$ ) was used as a positive control. The  $\text{IC}_{50} > 50 \mu\text{M}$  was regarded as non-active.

#### **X-ray crystal structure determination of archangiumide (1).**

The white needle crystals of archangiumide (1) were obtained from MeOH solvent by evaporating in a glass vial under ambient condition. The suitable crystals were selected under the microscope and were mounted at room temperature in vaseline to protect crystals. Single crystal X-ray diffraction data were collected on a Rigaku Oxford XtaLAB Synergy-DW diffractometer equipped with *mono*-chromated Cu  $\text{K}\alpha$  radiation at 100 K. The detector was Hypix 6000HE and crystal-to-detector distances were maintained as 50 mm during the measurement. The data were reduced and integrated with CrysAlisPro software. The structure of archangiumide was established by direct methods <sup>5</sup> and refined on  $F^2$  through full-matrix least squares fitting using OLEX2, on the basis of anisotropic displacement parameters with the final least-squares refinement indexes  $\geq 2\sigma$ . A SCALE program was used for numerical absorption corrections. Molecular graphics were carried out by using OLEX2 and Diamond software. The crystallographic data for archangiumide was summarized in [Table S2](#). This structure has been deposited in CCDC database under the accession number 2058107.

#### **Genome sequencing, assembly, and annotation.**

Genomic DNA of *Archangium violaceum* SDU8 was extracted by the whole genome DNA sequencing kit (Oxford Nanopore Technologies Inc., Oxford, U.K.). Genome sequencing was conducted by Benagene (Wuhan, China), by joining the strength of Illumina and Nanopore technologies. Illumina sequencing produced a total of 2.64 G of raw data, and filtered to generate

2.63 G of clean data. After removing connector, short fragments and low-quality data, a total of 3,120,498,886 bp clean data for assembly was obtained. This sequencing was based on the pass reads ( $Q>7$ ) with extracting the longest sequence of reads, and the total valid data was approximately 1 G. Unicycler (0.4.8) software (<https://github.com/rrwick/Unicycler>) was used to assemble the filtered reads. Genes were annotated based on the BLAST against databases COG (<https://www.ncbi.nlm.nih.gov/COG/>), KEGG (<https://www.kegg.jp/kegg/>), Refseq (<https://www.ncbi.nlm.nih.gov/refseq/>), Uniprot (<https://www.uniprot.org/>). The genome has been deposited at GenBank under the accession NO. CP069396.

#### **HR-QToF-ESI-MS analysis.**

The HR-Q-ToF-ESI-MS analysis was performed on an UHPLC system (Dionex, UltiMate3000, UHPLC) coupled with an ESI-Q-ToF mass spectrometer (Bruker Daltonics, Impact HD). The chromatographic separation was done using a Luna C<sub>18</sub> HPLC 5  $\mu$ m column 250  $\times$  4.6 mm (Phenomenex) at a flow rate of 0.8 mL/min and a column temperature of 30 °C. 3  $\mu$ L of sample was eluted with a gradient of solvent A (water) and B (methanol). The initial percentage of B was 5%, which was linearly increased to 100% in 30 min, followed by a 10 min isocratic period, and then re-equilibrated with original conditions in 6 min. ESI-positive mode was used for scanning. Nitrogen was used as drying and nebulizing gas. The gas flow was set at 6 L/min at 200 °C, and the nebulizer pressure was 0.0 bar. The MS data was acquired over mass range of  $m/z$  50–1500. Water and methanol were LC-MS grade (Optima, Fisher Scientific, NJ, U.S.A.). The data was analyzed by DataAnalysis software (Bruker Daltonics), and Quadratic + HPC mode was internal calibration with sodium formate.

#### **<sup>13</sup>C isotope labeling of archangiumide**

0.4 g of [<sup>1-<sup>13</sup>C</sup>]-sodium acetate or [<sup>2-<sup>13</sup>C</sup>]-sodium acetate was added to one liter of SDU8 culture after 36 h of incubation. After an additional 5.5 days fermentation, the culture was harvested by extraction with ethyl acetate. The extract was dried under vacuum, and subjected to Sephadex LH-20 column eluted with methanol to resolve 10 fractions. The fraction containing archangiumide



was separated by semi-preparative RP-HPLC to afford 1.80 mg and 6.6 mg from [1- $^{13}\text{C}$ ]-sodium acetate and [2- $^{13}\text{C}$ ]-sodium acetate-labelled experiments, respectively. Finally, the labeled archangiumide was subjected to  $^{13}\text{C}$  NMR analysis (methanol- $d_4$ , 150 MHz).

**Table S1.** Annotations for archangiumide biosynthetic gene cluster *arc* (GeneBank Accession NO. MW488041).

| ORF | Gene size (bp) | Gene name   | Proposed function                  | NCBI similarity                                                                                     | ID% |
|-----|----------------|-------------|------------------------------------|-----------------------------------------------------------------------------------------------------|-----|
| 1   | 1167           | <i>arcL</i> | oxidation                          | N-acetyl-gamma-glutamyl-phosphate reductase [ <i>Vitiosangium</i> sp. GDMCC 1.1324]; WP_108065195.1 | 91% |
| 2   | 1107           | <i>arcF</i> | loading ACP                        | 2-oxo acid dehydrogenase subunit E2 [ <i>Chthonomonas calidirosea</i> ]; WP_075163492.1             | 40% |
| 3   | 12819          | <i>arcA</i> | type I PKS                         | polyketide synthase [ <i>Pseudomonas batumici</i> ]; AKQ22649.1                                     | 45% |
| 4   | 19323          | <i>arcB</i> | type I PKS                         | polyketide synthase [ <i>Pelosinus fermentans</i> ]; WP_052697319.1                                 | 46% |
| 5   | 1143           | <i>arcM</i> | oxidation                          | LLM class flavin-dependent oxidoreductase [ <i>Okeania</i> sp. SIO3B3]; NEP84979.1                  | 65% |
| 6   | 7110           | <i>arcC</i> | type I PKS                         | polyketide synthase [ <i>Rhizobium</i> sp. BK315]; WP_165915351.1                                   | 43% |
| 7   | 1263           | <i>arcG</i> | beta-branching methyl biosynthesis | HMG-CoA synthase family protein [ <i>Bacillus wiedmannii</i> ]; WP_098202504.1                      | 72% |
| 8   | 258            | <i>arcH</i> | beta-branching methyl biosynthesis | acyl carrier protein [ <i>Gammaproteobacteria</i> bacterium]; RKZ52898.1                            | 67% |
| 9   | 1284           | <i>arcl</i> | beta-branching methyl biosynthesis | beta-ketoacyl-ACP synthase [ <i>Gammaproteobacteria</i> bacterium]; RKZ52897.1                      | 58% |
| 10  | 777            | <i>arcJ</i> | beta-branching methyl biosynthesis | enoyl-CoA hydratase [ <i>Gammaproteobacteria</i> bacterium]; RKZ52895.1                             | 54% |
| 11  | 747            | <i>arcK</i> | beta-branching methyl biosynthesis | enoyl-CoA hydratase/isomerase family protein [ <i>Methylocaldum</i> sp. 0917]; WP_133719094.1       | 59% |
| 12  | 984            | <i>arcD</i> | <i>trans</i> -AT                   | acyl hydrolase [ <i>Thioploca</i> sp.]; HEC83863.1                                                  | 42% |
| 13  | 2277           | <i>arcE</i> | <i>trans</i> -AT                   | [acyl-carrier-protein] S-malonyltransferase [ <i>Beggiatoa</i> sp. 4572_84]; OQY57292.1             | 60% |
| 14  | 777            | <i>arcO</i> | Unknown function                   | type I methionyl aminopeptidase [ <i>Corallococcus llansteffanensis</i> ]; WP_120641935.1           | 82% |
| 15  | 1221           | <i>arcN</i> | oxidation                          | cytochrome P450 [ <i>Gynuella sunshinyii</i> ]; WP_044617477.1                                      | 43% |

**Table S2.** X-ray crystallographic data for archangiumide (1)

|                                             |                                                               |
|---------------------------------------------|---------------------------------------------------------------|
| Empirical formula                           | C <sub>19</sub> H <sub>26</sub> O <sub>6</sub>                |
| Formula weight                              | 350.41                                                        |
| Temperature/K                               | 100.0                                                         |
| Crystal system                              | monoclinic                                                    |
| Space group                                 | P2 <sub>1</sub>                                               |
| a/Å                                         | 9.07240(10)                                                   |
| b/Å                                         | 6.74730(10)                                                   |
| c/Å                                         | 16.2178(2)                                                    |
| α/°                                         | 90                                                            |
| β/°                                         | 91.2770(10)                                                   |
| γ/°                                         | 90                                                            |
| Volume/Å <sup>3</sup>                       | 992.51(2)                                                     |
| Z                                           | 2                                                             |
| ρ <sub>calc</sub> /cm <sup>3</sup>          | 1.233                                                         |
| μ/mm <sup>-1</sup>                          | 0.777                                                         |
| F(000)                                      | 396.0                                                         |
| Crystal size/mm <sup>3</sup>                | 0.13 × 0.12 × 0.11                                            |
| Radiation                                   | Cu Kα (λ = 1.54184)                                           |
| 2θ range for data collection/°              | 5.45 to 152.976                                               |
| Index ranges                                | -10 ≤ h ≤ 11, -8 ≤ k ≤ 8, -20 ≤ l ≤ 20                        |
| Reflections collected                       | 18619                                                         |
| Independent reflections                     | 3999 [R <sub>int</sub> = 0.0458, R <sub>sigma</sub> = 0.0290] |
| Data/restraints/parameters                  | 3999/6/257                                                    |
| Goodness-of-fit on F <sup>2</sup>           | 1.136                                                         |
| Final R indexes [I ≥ 2σ (I)]                | R <sub>1</sub> = 0.0304, wR <sub>2</sub> = 0.0845             |
| Final R indexes [all data]                  | R <sub>1</sub> = 0.0330, wR <sub>2</sub> = 0.0879             |
| Largest diff. peak/hole / e Å <sup>-3</sup> | 0.24/-0.22                                                    |
| Flack parameter                             | 0.01(8)                                                       |

**Table S3.** Prediction of stereochemistry of the reduced carbon in archangiumide (**1**). The presence of a diagnostic Asp residue within LDD motif correlates with B-type ketoreduction (3*R*), whereas the absence of the Asp residue correlates with A-type ketoreduction (3*S*). The KR-predicted stereochemistry at positions C-3, C-6, and C-17 of archangiumide matched with the crystallography-confirmed structure in [Figure 2](#). The sequence alignment of KR domains was present in [Figure S10](#), whereby the second KR domain in the module 8 of ArcB was thought to be inactive due to the defect in the NADP(H) binding motif GGxGxxG.

| KR domain | Conserved Asp motif | KR type (position in acetate unit) | Corresponding position of -OH | Predicted stereochemistry/geometry in archangiumide | Observed stereochemistry/geometry in archangiumide |
|-----------|---------------------|------------------------------------|-------------------------------|-----------------------------------------------------|----------------------------------------------------|
| KR1       | IRD                 | B-type (3 <i>R</i> )               | 17                            | <i>R</i>                                            | <i>R</i>                                           |
| KR3+(DH)  | LRD                 | B-type (3 <i>R</i> )               | 12                            | 12 <i>E</i> -double bond                            | Allene group                                       |
| KR6+(DH)  | IQD                 | B-type (3 <i>R</i> )               | 6                             | 6 <i>E</i> -double bond                             | 6 <i>E</i> -double bond                            |
| KR7+(DH)  | IQD                 | B-type (3 <i>R</i> )               | 4                             | 4 <i>E</i> -double bond                             | epoxy                                              |
| KR8a      | IQD                 | B-type (3 <i>R</i> )               | 3                             | <i>S</i>                                            | <i>S</i>                                           |
| KR8b      | Inactive            |                                    |                               |                                                     |                                                    |

**Figure S1.** NMR (methanol- $d_4$ , 600 MHz) metabolic comparison of different extraction methods by using HP-20 and EtOAc.

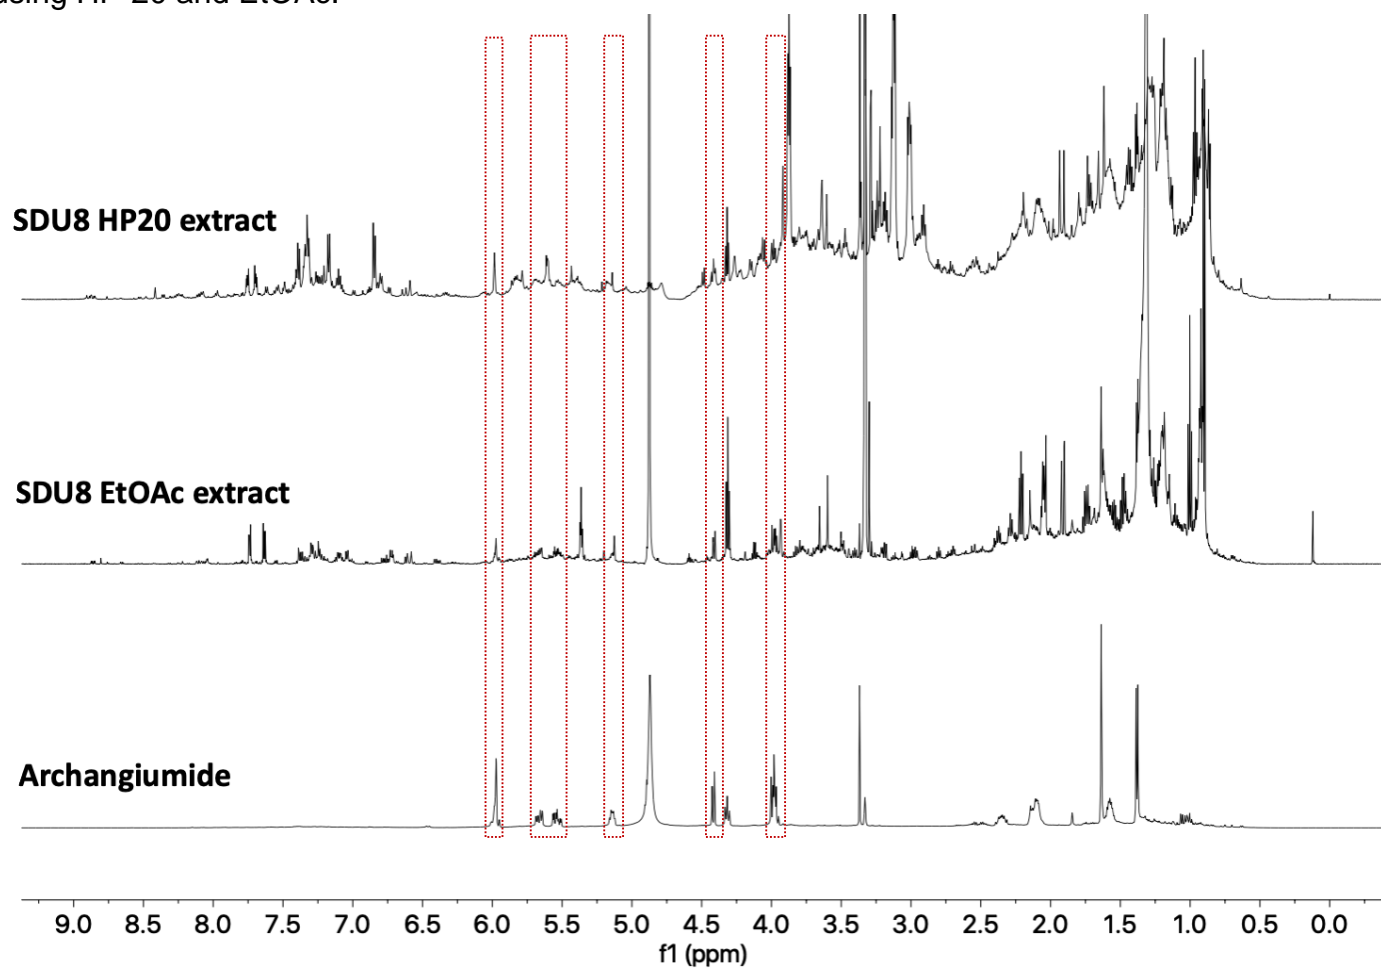

**Figure S2.**  $^1\text{H}$ - $^1\text{H}$  COSY (methanol- $d_4$ , 600 MHz) metabolic profiling of SDU8 EtOAc metabolome.

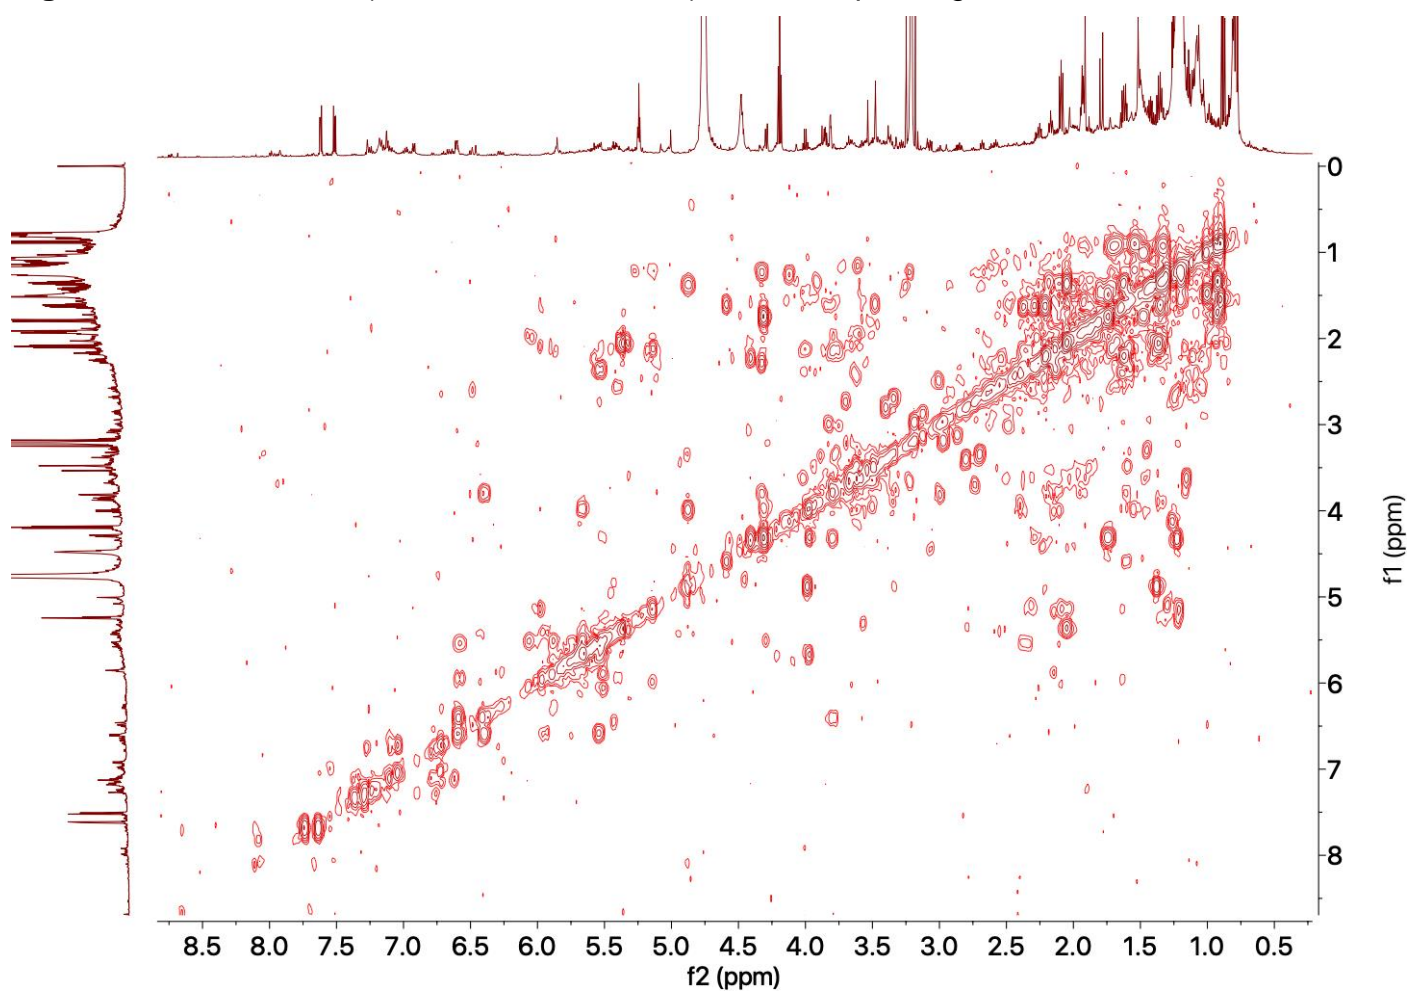

**Figure S3.**  $^1\text{H}$ - $^{13}\text{C}$  HSQC (methanol- $d_4$ , 600 MHz) metabolic profiling of SDU8 EtOAc metabolome.

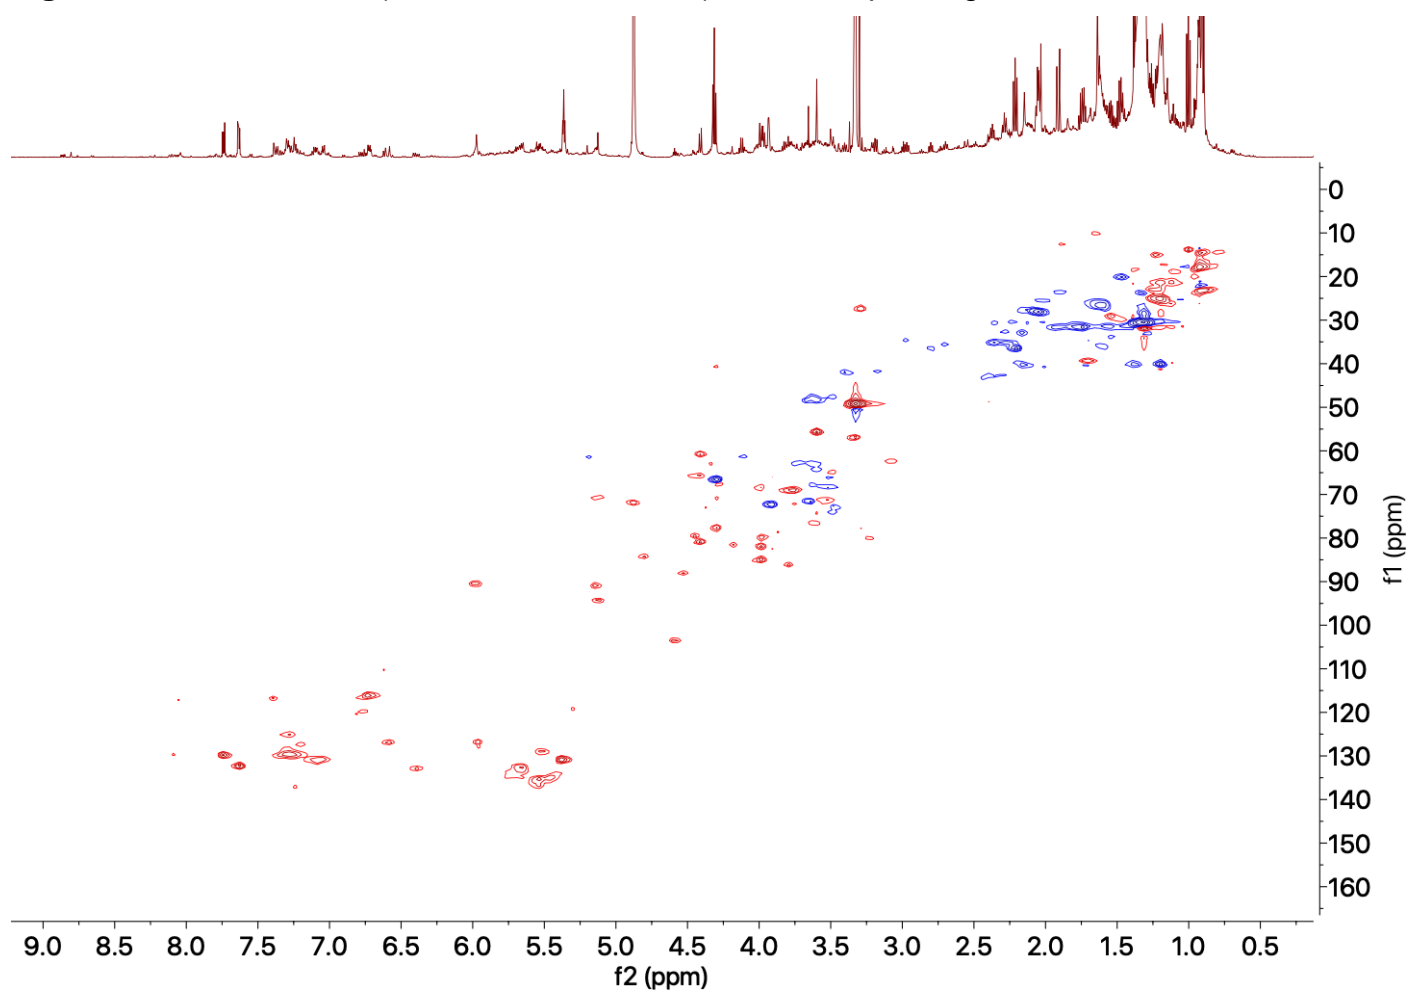

**Figure S4.**  $^1\text{H}$ - $^{13}\text{C}$  HMBC (methanol- $d_4$ , 600 MHz) metabolic profiling of SDU8 EtOAc metabolome.

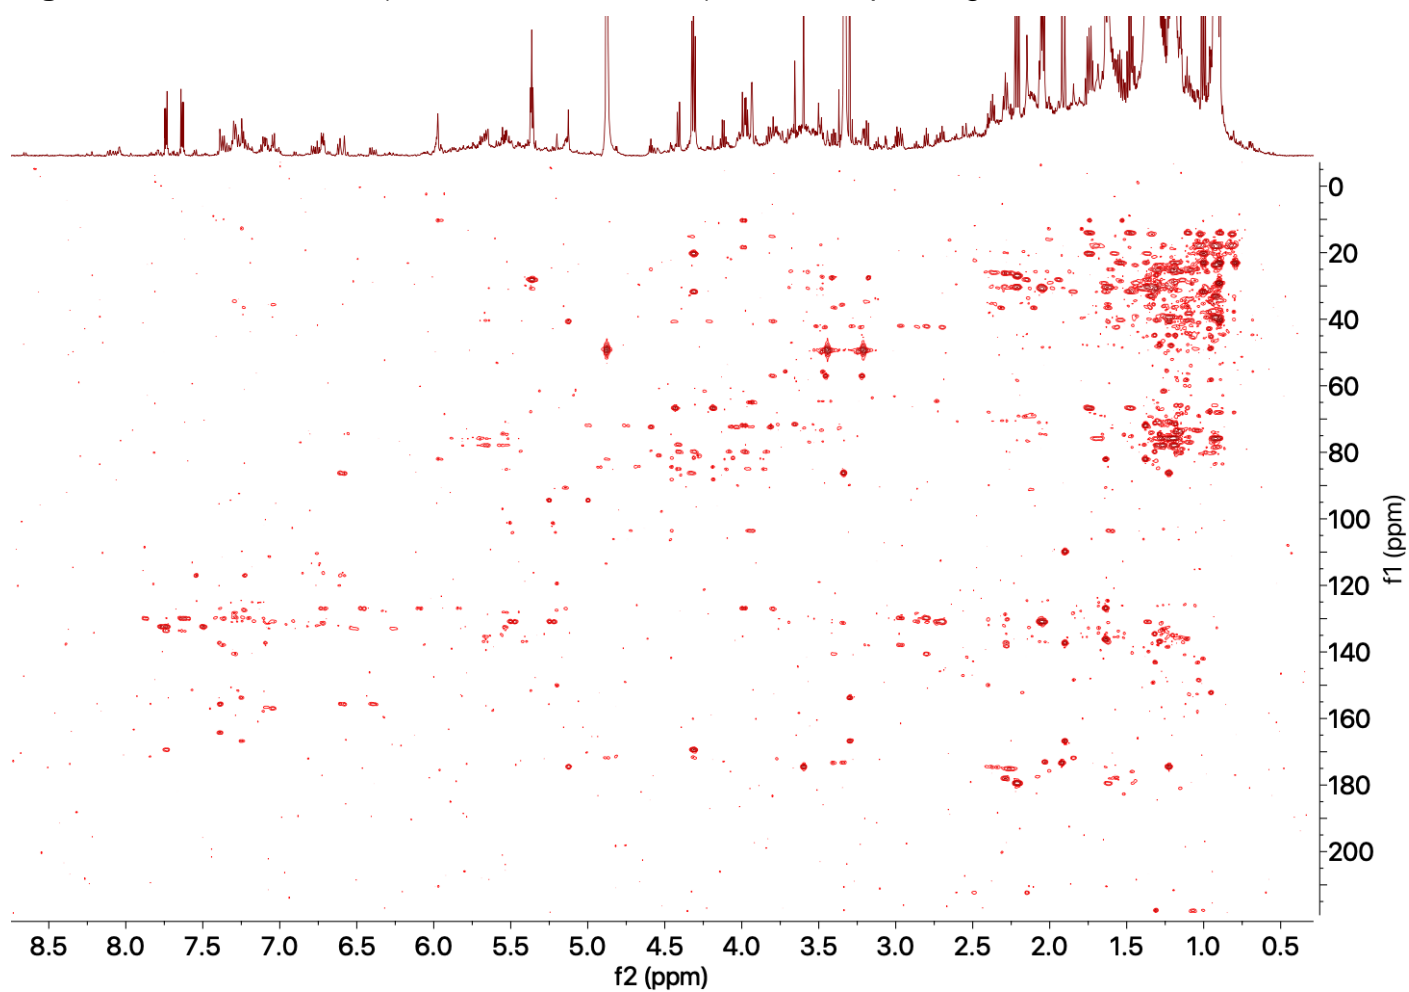



**Figure S5.** SMART 2.0 analysis of HSQC spectrum of SDU8 EtOAc crude extract. Top 12 structures based on cosine similarity score in the parentheses suggested that polyketidic macrolides were potentially contained in the mixture.<sup>6</sup>

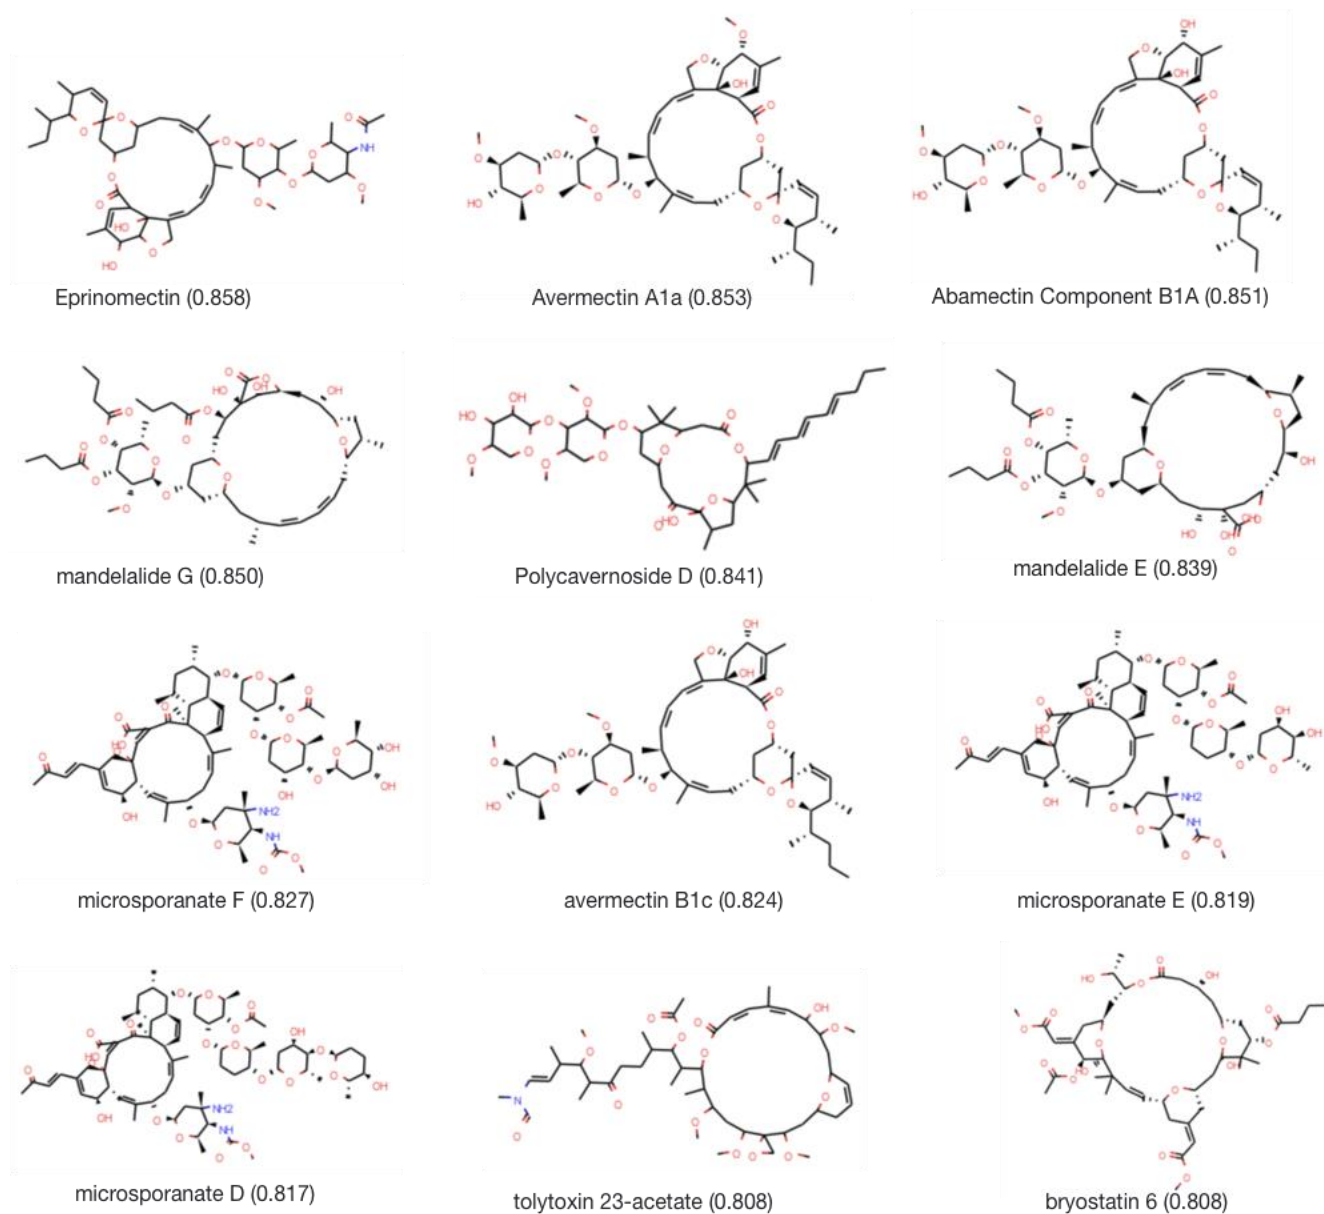

**Figure S6.** HMBC (  ) and COSY (  ) correlations for archangiumide.

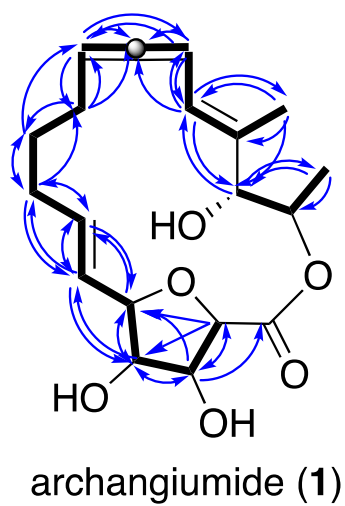

**Figure S7.** Key NOESY correlations (H $\leftrightarrow$ H) of archangiumide.

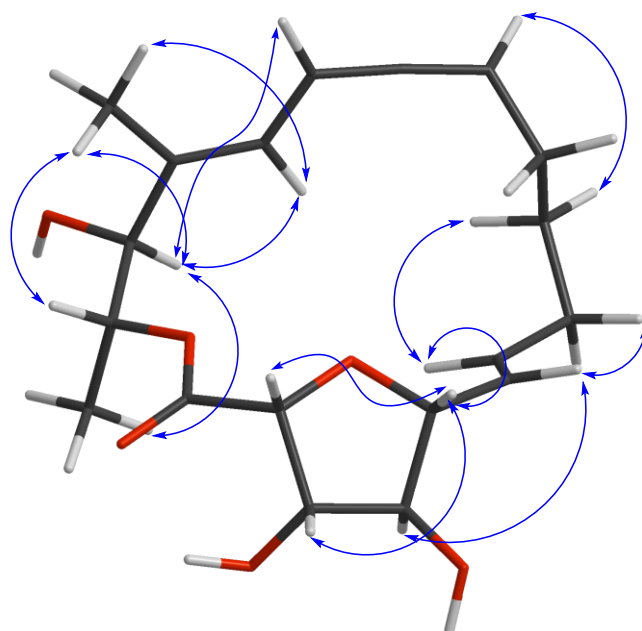

**Figure S8.** Phylogenetic analysis identified ArcE as malonyl-transferring AT, whereas ArcD is a acyl hydrolase (AH).<sup>7</sup>

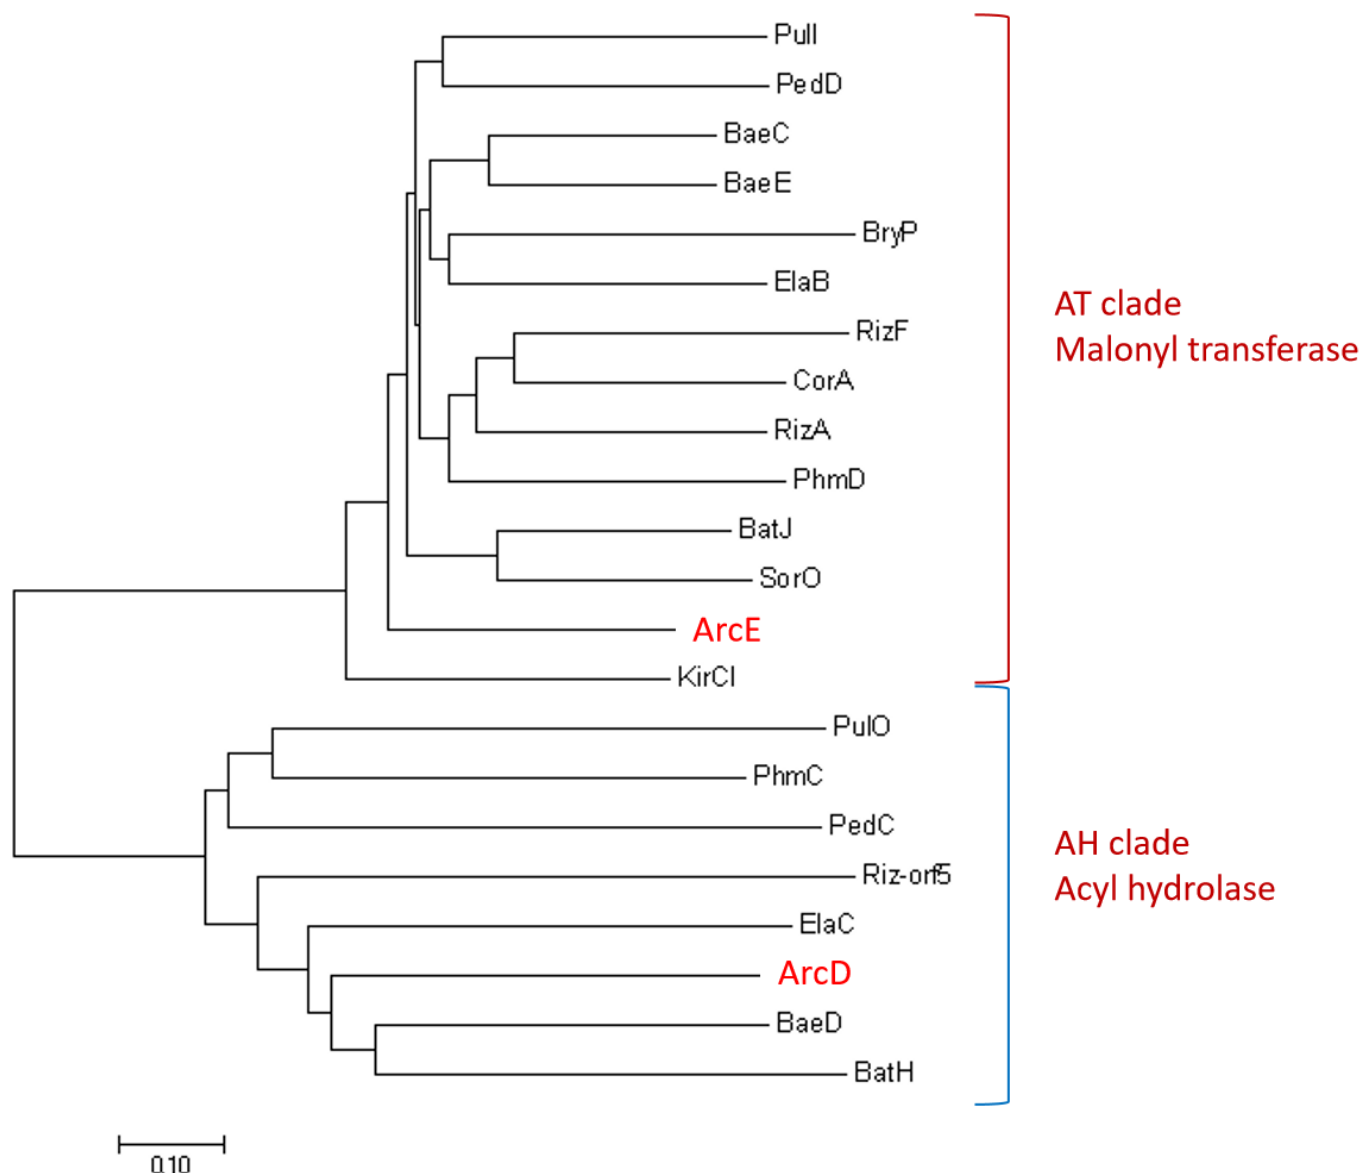

Accession numbers: Bae, bacillaene (BaeC, CAG23950.2; BaeD, CAG23951.1; BaeE, CAG23952.1); Bat, batumin/kalimantacin (BatH, ADD82949.1; BatJ, ADD82951.1); Bry, bryostatin (BryP, ABM63531.1); Cor, corallopynonin (CorA, ADI59523.1); Ela, elansolid (ElaB, AEC04348.1; ElaC, AEC04349.1); Kir, kirromycin (KirCl, CAN89639.1); Ped, pederin (PedC, AAS47559.1; PedD, AAS47563.1); Phm, phomidolide (PhmC, AMH40435.1; PhmD, AMH40436.1); Riz, rhizopodin (RizA, CCA89325.1; RizF, CCA89330.1; Riz-orf5, CCA89331.1); Sor, sorangicin (SorO, ADN68489.1); Pulvomycin (Pull OEU94861.1; PulO OEU94840.1)

[illegible]

|      |   |   |       |   |   |   |   |   |   |       |       |   |   |   |       |       |       |       |       |   |       |       |   |       |   |       |   |   |   |   |   |       |   |       |       |   |       |       |   |   |       |   |   |   |       |       |       |   |       |       |   |   |       |       |       |       |   |   |       |   |   |       |   |       |   |   |   |   |   |   |       |       |       |     |   |       |     |   |   |     |       |     |       |     |       |   |   |   |   |   |   |   |   |   |   |   |       |     |
|------|---|---|-------|---|---|---|---|---|---|-------|-------|---|---|---|-------|-------|-------|-------|-------|---|-------|-------|---|-------|---|-------|---|---|---|---|---|-------|---|-------|-------|---|-------|-------|---|---|-------|---|---|---|-------|-------|-------|---|-------|-------|---|---|-------|-------|-------|-------|---|---|-------|---|---|-------|---|-------|---|---|---|---|---|---|-------|-------|-------|-----|---|-------|-----|---|---|-----|-------|-----|-------|-----|-------|---|---|---|---|---|---|---|---|---|---|---|-------|-----|
| K351 | H | A | ----- | G | T | R | T | G | Y | V     | A     | I | C | S | D     | Y     | G     | ----- | L     | L | Q     | L     | Q | P     | L | A     | R | T | A | C | H | V     | L | T     | G     | S | P     | ----- | S | M | L     | A | N | N | I     | S     | F     | L | D     | F     | D | R | ----- | P     | S     | E     | T | L | D     | T | A | ----- | S | S     | S | L | I | A | L | H | H     | A     | V     | Q   | A | M     | R   | G | D | C   | E     | Q   | A     | L   | ----- | G | A | V | N | L | L | S | P | R | L | F | ----- | 200 |
| K352 | S | G | ----- | R | F | T | V | G | Y | A     | I     | K | T | G | D     | ----- | L     | Y     | R     | S | ----- | G     | Q | E     | K | F     | H | P | T | S | F | ----- | S | L     | A     | N | N     | R     | Y | F | A     | E | D | F | ----- | P     | S     | L | P     | V     | D | T | M     | ----- | S     | A     | S | L | T     | I | A | H     | C | E     | I | R | N | G | S | D | ----- | G     | A     | V   | N | L     | L   | S | P | R   | L     | F   | ----- | 201 |       |   |   |   |   |   |   |   |   |   |   |   |       |     |
| K353 | S | G | ----- | G | V | R | G | T | I | L     | ----- | C | I | M | S     | N     | E     | Y     | W     | Q | ----- | V     | L | L     | R | P     | K | Y | M | G | A | I     | Q | T     | ----- | N | L     | A     | A | R | Y     | F | L | N | L     | K     | ----- | P | A     | I     | S | L | D     | T     | M     | ----- | S | A | S     | L | T | I     | A | H     | C | E | I | R | N | G | S     | D     | ----- | 202 |   |       |     |   |   |     |       |     |       |     |       |   |   |   |   |   |   |   |   |   |   |   |       |     |
| K354 | E | A | ----- | S | T | S | I | I | L | ----- | A     | K | E | N | I     | Y     | R     | N     | N     | Y | ----- | L     | L | P     | R | T     | L | P | K | A | I | Q     | T | ----- | N     | L | V     | A     | A | R | Y     | F | D | L | N     | ----- | T     | S | K     | T     | L | D | T     | M     | ----- | S     | A | S | L     | T | I | A     | H | C     | E | I | R | N | G | S | D     | ----- | 203   |     |   |       |     |   |   |     |       |     |       |     |       |   |   |   |   |   |   |   |   |   |   |   |       |     |
| K355 | I | I | ----- | G | S | K | T | G | Y | ----- | C     | C | F | Q | Y     | W     | ----- | E     | I     | V | R     | S     | H | ----- | V | S     | M | D | Y | Q | A | H     | S | ----- | S     | A | M     | S     | L | S | G     | T | V | S | M     | F     | D     | L | ----- | G     | C | S | I     | P     | L     | D     | N | A | ----- | S | A | S     | L | T     | I | A | H | C | E | I | R     | N     | G     | S   | D | ----- | 204 |   |   |     |       |     |       |     |       |   |   |   |   |   |   |   |   |   |   |   |       |     |
| K356 | A | S | ----- | G | S | A | T | L | F | V     | ----- | T | A | S | T     | G     | Y     | Q     | ----- | V | R     | M     | D | T     | S | ----- | V | S | I | E | G | H     | T | A     | ----- | V | A     | V     | V | A | S     | V | G | P | N     | L     | ----- | S | Y     | L     | L | N | L     | H     | ----- | P     | S | E | P     | I | E | T     | A | ----- | S | A | S | L | T | I | A     | H     | C     | E   | I | R     | N   | G | S | D   | ----- | 205 |       |     |       |   |   |   |   |   |   |   |   |   |   |   |       |     |
| K357 | R | A | D     | S | A | S | A | P | Q | K     | N     | V | G | Y | ----- | V     | M     | Y     | E     | E | Y     | ----- | Q | ----- | F | Y     | G | Q | E | L | L | K     | N | P     | L     | G | T     | ----- | N | P | ----- | S | G | I | A     | N     | R     | Y | S     | F     | C | N | F     | H     | ----- | P     | S | M | A     | V | D | T     | M | ----- | S | S | L | T | I | I | H     | L     | A     | C   | Q | S     | L   | R | G | Q   | C     | R   | M     | A   | ----- | G | V | N | V | S | I | H | P | K | N | Y | ----- | 210 |
| K358 | R | A | D     | S | A | S | A | P | Q | K     | N     | V | G | Y | ----- | V     | M     | Y     | E     | E | Y     | ----- | Q | ----- | F | Y     | G | Q | E | L | L | K     | N | P     | L     | G | T     | ----- | N | P | ----- | S | G | I | A     | N     | R     | Y | S     | F     | C | N | F     | H     | ----- | P     | S | M | A     | V | D | T     | M | ----- | S | S | L | T | I | I | H     | L     | A     | C   | Q | S     | L   | R | G | Q   | C     | R   | M     | A   | ----- | G | V | N | V | S | I | H | P | K | N | Y | ----- | 211 |
| K359 | G | K | ----- | K | S | R | T | G | Y | V     | A     | L | E | D | N     | E     | Y     | L     | ----- | H | L     | R     | A | ----- | R | V     | D | L | G | V | N | G     | F | N     | H     | P | ----- | S     | M | V | A     | N | R | Y | S     | F     | D     | L | N     | ----- | P | S | E     | I     | V     | N     | T | M | ----- | A | G | A     | V | A     | I | R | A | M | T | A | I     | H     | N     | R   | E | ----- | I   | D | L | A</ |       |     |       |     |       |   |   |   |   |   |   |   |   |   |   |   |       |     |

| Accession | Protein   | Gene     | Species | Length  | Score   | E-value | Identity | Positives | Score    | E-value | Identity  | Positives  |             |         |        |        |        |        |        |     |
|-----------|-----------|----------|---------|---------|---------|---------|----------|-----------|----------|---------|-----------|------------|-------------|---------|--------|--------|--------|--------|--------|-----|
| AK51      | AAYSDAGML | SPDGRCRT | DARAN   | CYVRCE  | GVTVLML | KPLAR   | ARADGR   | IRHGLVRS  | TAVNHGR  | GR      | ANSLTAF   | NPNAQTELLV | SAYEAANVPLQ | SIGVVE  | HGTGTL | LGDPLE | 310    |        |        |     |
| AK52      | AYLSRMMRL | SDGCKNRS | GKGNCF  | VPFPGES | GAILKRL | QDEKDG  | LYGVYVIR | GSAINHGR  | TS       | SGTYTVE | NPNAQGEEL | ISAALERAV  | RDATLSI     | YIE     | HGTGTL | LGDPLE | 316    |        |        |     |
| AK53      | QRMCEAGML | SPQGRCTF | DNKAGD  | GVFPAAE | TAAYVLR | KLED    | VEAGHG   | LYGVYVIR  | GSAINHGR | DK      | TNGITAF   | SANSGSEL   | QRNVYRFG    | SIPESIS | YIE    | HGTGTL | LGDPLE | 316    |        |     |
| AK54      | IGFSRAEVL | SDDGKSYV | DERAKF  | GVFLGEG | AGALLK  | DPYDA   | VRDGDN   | ILGSLIS   | GSAYNDH  | GR      | TMGLTVE   | NPQEQKAV   | IEAALRSQ    | VNPNFL  | SI     | YIE    | HGTGTL | LGDPLE | 316    |     |
| AK55      | VYFSRLQAL | PTGHCHS  | DKKAGD  | GVVPGEG | GVSVL   | KPLDAA  | IRDGRG   | THAVIKGT  | AIANHVR  | GR      | SNNPYAR   | RPELQTKLL  | REAWKNAG    | INPFDL  | SI     | YIE    | HGTGTL | LGDPLE | 314    |     |
| AK56      | ISFNKAGML | CEDGRCCT | SKSAN   | CYVRCE  | GAGIVFL | KRLRD   | KRDNDH   | YAVIKAT   | SENHGR   | GR      | QGSTLAF   | NANAQAEL   | IKDAYRKA    | GIDPR   | TVTS   | YIE    | HGTGTL | LGDPLE | 315    |     |
| AK57      | ILLSGQKFL | STHGKCES | GRGGDG  | GVVPGEG | GVGVVL  | KPLED   | VRDGDH   | YGVYVIR   | KATANHGR | GR      | TNGTYVE   | NPQAQTA    | AVIRQAL     | EQAQV   | VDVRL  | SV     | YIE    | HGTGTL | LGDPLE | 320 |
| AK58      | ILLSGQKFL | STHGKCES | GRGGDG  | GVVPGEG | GVGVVL  | KPLED   | VRDGDH   | YGVYVIR   | KATANHGR | GR      | TNGTYVE   | NPQAQTA    | AVIRQAL     | EQAQV   | VDVRL  | SV     | YIE    | HGTGTL | LGDPLE | 320 |
| AK59      | IGLRLMKLV | STHGKCES | GRGGDG  | GVVPGEG | GVGVVL  | KPLED   | VRDGDH   | YGVYVIR   | KATANHGR | GR      | TNGTYVE   | NPQAQTA    | AVIRQAL     | EQAQV   | VDVRL  | SV     | YIE    | HGTGTL | LGDPLE | 320 |
| AK60      | IGLRLMKLV | STHGKCES | GRGGDG  | GVVPGEG | GVGVVL  | KPLED   | VRDGDH   | YGVYVIR   | KATANHGR | GR      | TNGTYVE   | NPQAQTA    | AVIRQAL     | EQAQV   | VDVRL  | SV     | YIE    | HGTGTL | LGDPLE | 320 |
| AK61      | IGLRLMKLV | STHGKCES | GRGGDG  | GVVPGEG | GVGVVL  | KPLED   | VRDGDH   | YGVYVIR   | KATANHGR | GR      | TNGTYVE   | NPQAQTA    | AVIRQAL     | EQAQV   | VDVRL  | SV     | YIE    | HGTGTL | LGDPLE | 320 |
| AK62      | IGLRLMKLV | STHGKCES | GRGGDG  | GVVPGEG | GVGVVL  | KPLED   | VRDGDH   | YGVYVIR   | KATANHGR | GR      | TNGTYVE   | NPQAQTA    | AVIRQAL     | EQAQV   | VDVRL  | SV     | YIE    | HGTGTL | LGDPLE | 320 |
| AK63      | IGLRLMKLV | STHGKCES | GRGGDG  | GVVPGEG | GVGVVL  | KPLED   | VRDGDH   | YGVYVIR   | KATANHGR | GR      | TNGTYVE   | NPQAQTA    | AVIRQAL     | EQAQV   | VDVRL  | SV     | YIE    | HGTGTL | LGDPLE | 320 |
| AK64      | IGLRLMKLV | STHGKCES | GRGGDG  | GVVPGEG | GVGVVL  | KPLED   | VRDGDH   | YGVYVIR   | KATANHGR | GR      | TNGTYVE   | NPQAQTA    | AVIRQAL     | EQAQV   | VDVRL  | SV     | YIE    | HGTGTL | LGDPLE | 320 |
| AK65      | IGLRLMKLV | STHGKCES | GRGGDG  | GVVPGEG | GVGVVL  | KPLED   | VRDGDH   | YGVYVIR   | KATANHGR | GR      | TNGTYVE   | NPQAQTA    | AVIRQAL     | EQAQV   | VDVRL  | SV     | YIE    | HGTGTL | LGDPLE | 320 |
| AK66      | IGLRLMKLV | STHGKCES | GRGGDG  | GVVPGEG | GVGVVL  | KPLED   | VRDGDH   | YGVYVIR   | KATANHGR | GR      | TNGTYVE   | NPQAQTA    | AVIRQAL     | EQAQV   | VDVRL  | SV     | YIE    | HGTGTL | LGDPLE | 320 |
| AK67      | IGLRLMKLV | STHGKCES | GRGGDG  | GVVPGEG | GVGVVL  | KPLED   | VRDGDH   | YGVYVIR   | KATANHGR | GR      | TNGTYVE   | NPQAQTA    | AVIRQAL     | EQAQV   | VDVRL  | SV     | YIE    | HGTGTL | LGDPLE | 320 |
| AK68      | IGLRLMKLV | STHGKCES | GRGGDG  | GVVPGEG | GVGVVL  | KPLED   | VRDGDH   | YGVYVIR   | KATANHGR | GR      | TNGTYVE   | NPQAQTA    | AVIRQAL     | EQAQV   | VDVRL  | SV     | YIE    | HGTGTL | LGDPLE | 320 |
| AK69      | IGLRLMKLV | STHGKCES | GRGGDG  | GVVPGEG | GVGVVL  | KPLED   | VRDGDH   | YGVYVIR   | KATANHGR | GR      | TNGTYVE   | NPQAQTA    | AVIRQAL     | EQAQV   | VDVRL  | SV     | YIE    | HGTGTL | LGDPLE | 320 |
| AK70      | IGLRLMKLV | STHGKCES | GRGGDG  | GVVPGEG | GVGVVL  | KPLED   | VRDGDH   | YGVYVIR   | KATANHGR | GR      | TNGTYVE   | NPQAQTA    | AVIRQAL     | EQAQV   | VDVRL  | SV     | YIE    | HGTGTL | LGDPLE | 320 |
| AK71      | IGLRLMKLV | STHGKCES | GRGGDG  | GVVPGEG | GVGVVL  | KPLED   | VRDGDH   |           |          |         |           |            |             |         |        |        |        |        |        |     |

|      |                                          |                                        |                                |         |     |
|------|------------------------------------------|----------------------------------------|--------------------------------|---------|-----|
| K531 | VEALQNAFAKLQKKRGEDLSRRHRCALGSIKTNIGHLES  | AAGAAGLIVILACLNRKQLPPTVTHFEQMNPHLHLTGS | PFYVVDKLQPWEPLVDGAGAHWPFRAGVS  | SFGFGGA | 421 |
| K532 | IAGLSKAFKKHSD-----KQFCAIGSVANIGHLEAA     | AGIAGTVILLQLAHGKLPVSLHSESFNPNINFALS    | PFKVQRTLSTWERPV-IDGGRWPRAGIS   | SFGFGGS | 420 |
| K533 | LDALITVYFREDTR-----KRFCAIGSVTNLGHETAA    | AGLVSLERILLSLKHGKLPVSHSQGNPHIDFDS      | PPFVNTILRETRIG-----DQPRRAAIS   | SFGFSST | 426 |
| K534 | IKAAATQVMRYQTSK-----RQYCALGVSNNLGHETMT   | AGITSLINVLSMVNRKIPATLNCSSPHPRKFQES     | PFPPNTILRETPERK-----GSLRAAIS   | SFGFGIT | 425 |
| K535 | INALKAAMKPYTSK-----GPFCAIGSVKAHIGHELGA   | AGLASLIVLMLKNRKPMPNPLNPLVIRLDS         | PIFINELMDREK-----GKPLRAAGS     | SFGGNN  | 414 |
| K536 | GLKGFQALVEYEWGVQPTIGKELHLEAGAGVGLV       | AGLIVLAKMHLGKLPVSHLGGDVPVYKLDFD        | PFYVQVLRQPPEDIDEGSTL           | DFG     | 427 |
| K537 | ISGLTKAYEGRGEC-----GPLCAIGSVSNIGHCESS    | AGAGVTVLVLQKLYQVPSIHSQELNPNIDFTKTP     | FRVQRELGEKKRPV-VEGRERPRVAGIS   | SFGAGGS | 424 |
| K538 | ISGLTKAYEGRGEC-----GPLCAIGSVSNIGHCESS    | AGAGVTVLVLQKLYQVPSIHSQELNPNIDFTKTP     | FRVQRELGEKKRPV-VEGRERPRVAGIS   | SFGAGGS | 424 |
| K539 | WEACNRRALQLASQAQGNVIEPGSCRISTLKMPLCHMECA | SALGAVLIVRTFQTKVHKILGLERNVNDLDEGR      | PCRLMTSTTPTRGQ-----RPLRALGHS   | VSFGGN  | 420 |
| K540 | IKTVOHYEVSAPSG-----ALGITGINKLGLGAS       | SVYGLIKSVISFNNTLIRILNLGNWDEADGEL       | PCRLRLDTEAPAKY-OGCGRVPRVEXGHYV | YFGGN   | 417 |

|             |                     |     |
|-------------|---------------------|-----|
| <i>KS1</i>  | N A H A V I I E E Y | 430 |
| <i>KS2</i>  | N A H V I I E E Y   | 429 |
| <i>KS3</i>  | N A H M V I E E Y   | 425 |
| <i>KS4</i>  | N C H M I V E E A   | 424 |
| <i>KS5</i>  | N S H V V L E E Y   | 423 |
| <i>KS6</i>  | N A H V V L E E Y   | 435 |
| <i>KS7</i>  | N A H V I I E E Y   | 433 |
| <i>KS8</i>  | N A H V I I E E Y   | 433 |
| <i>KS9</i>  | N A H L L L E E Y   | 429 |
| <i>KS10</i> | N A H A I L E E Y   | 426 |

**Figure S10.** Sequence alignment of KR domains of *arc* PKSs. The NADP(H) binding motif GGxGxxG was indicated in blue box. Analysis of the diagnostic Asp presence within a LDD signature motif represented in red box allowed the classification of KR types.

|     |                                                                |            |
|-----|----------------------------------------------------------------|------------|
|     | <b>GGxGxxG</b>                                                 |            |
| KR6 | GVYVVTGGTNGIGLEVAKLLARRGASKLVLMGVTPLPKRWTHLVHDSSTPEYVRRKLE     | 60         |
| KR2 | -VYWITGGLGGLGTIFVRHLCATEGVTVVLSGRSPLTGDRQKALE-----             | 44         |
| KR1 | GVYWITGGLGGLGLIFARHLGRVGS AKLVLTGRSPLSDEKRVQLD-----            | 45         |
| KR5 | GVYWITGGMGGLGLHFARHLGQTKGVKVVLSGRSALDETKTAALE-----             | 45         |
| KR4 | GVYWITGGMGGLGLHFARHLGQTKGVKVVLSGRSALDETKTAALE-----             | 45         |
| KR3 | GVYWITGGMGGLGLHFARHLGQTKGVKVVLSGRSALDETKTAALE-----             | 45         |
|     | ** :*** .*: * ..: * . .:*** * : * .                            |            |
|     |                                                                | <b>LDD</b> |
| KR6 | AFLELEGRGVSVTLTYTGPLDDRARLGAFFGDIRRELGAIRGVVHSAGAMQAAGDEFAFV   | 120        |
| KR2 | -ELRQEG--FQVEYVQVDVGEKEQVRRASFSEIKREHGRIDGIVHSAGILRDS-----LLL  | 96         |
| KR1 | -ALRASG--ATVEYLQGDIAVREDVQRIVAEIKRRHGRNLNGVIHSAGLIRDA-----FII  | 97         |
| KR5 | -ELRRQQPHATFTTYVAVDLGDRGAVAGAVEKLRAEYGGVKGVHSAGVIQDA-----YVV   | 99         |
| KR4 | -ELRRQQPHATFTTYVAVDLGDRGAVAGAVEKLRAEYGGVKGVHSAGVIQDA-----YVV   | 99         |
| KR3 | -ELRRQQPHATFTTYVAVDLGDRGAVAGAVEKLRAEYGGVKGVHSAGVIQDA-----YVV   | 99         |
|     | *. . . : : : . .: . * : *:***** :: : .:                        |            |
| KR6 | RKSLKRMEEVFAPK IAGLDTLSSLLSADDLDFFVSFSSTAGQLPGFMRGMSDYGIANAYV  | 180        |
| KR2 | NKSGADAAQVFGSKVDGALNVDEVTKNEALDFFVLFAFAGVFGN--VGQGDYSGANAFL    | 154        |
| KR1 | KKTEAEIATVMAPKVGGVVNVDLATREEPLDFFVVFSSMTSLLGN--VGQADYSAANAFL   | 155        |
| KR5 | KKEEGQIEAVFAPKVKG LLLNLEEATREEELDFVVLFS LAGAMGS--AGQADYAGANAFL | 157        |
| KR4 | KKEEGQIEAVFAPKVKG LLLNLEEATREEELDFVVLFS LAGAMGS--AGQADYAGANAFL | 157        |
| KR3 | KKEEGQIEAVFAPKVKG LLLNLEEATREEELDFVVLFS LAGAMGS--AGQADYAGANAFL | 157        |
|     | . * *: . *: * ..: : ***. * *: * :. : . * .*. ***::             |            |
| KR6 | DSFTEFQAHGG-----KPCFRSMAWVGWADT                                | 206        |
| KR2 | DAFARARNGQVARGERRGRTVSI DWPLWRDG                               | 185        |
| KR1 | DGYAEYRQRLVQEGERSGKTLSVSWPLWKEG                                | 186        |
| KR5 | DAYAEYRQGQVREGKRKGRTVSVGWPLWREG                                | 188        |
| KR4 | DAYAEYRQGQVREGKRKGRTVSVGWPLWREG                                | 188        |
| KR3 | DAYAEYRQGQVKEGKRKGRTVSVGWPLWKEG                                | 188        |
|     | *. .: . : *: * * :                                             |            |

**Figure S11.** Sequence alignment of the ACP domains from *arc* PKSs. The serine residue that serves as the attachment site for the 4'-PP cofactor was highlighted in red box, the signature tryptophan residue for  $\beta$ -branching was marked in blue box.

|           | 10 | 20                                                                              | 30                                    | 40                                                          | 50                                                                | 60                                          | 70        | 80 |  |
|-----------|----|---------------------------------------------------------------------------------|---------------------------------------|-------------------------------------------------------------|-------------------------------------------------------------------|---------------------------------------------|-----------|----|--|
| ArcA-ACP1 | 1  | - - - - -                                                                       | D A L K E L L A G V I K -             | I P S S K I D E T E S F E M Y G I D S                       | I M I G Q I N R I L D E V L G D N L V S K T L F Y E Y R T L A D L | A D Y F L Q E                               | - - - - - | 71 |  |
| ArcA-ACP2 | 1  | - - - - -                                                                       | E L K R Q L K T L L F -               | L D S T N I D E A L K F T E L G L D S                       | I V G V E W T R L I G E R F S L K -                               | I P A T R L Y D Y P T I S D L A A F I       | - - - - - | 66 |  |
| ArcA-ACP3 | 1  | - - - - -                                                                       | T L E K Q L A Q L L F -               | L K E G E L R D G K F V D L G L D S                         | I I G V E W V K L I N E R F G L K -                               | L P A T K L Y D H P T L V D L S A F I       | - - - - - | 66 |  |
| ArcA-ACP4 | 1  | - - - - -                                                                       | T L A K Q L T A L L F -               | L K E G E V R E D E K F V D L G M D S                       | I I G V E W I K S I N Q H F G L K -                               | L A A T K L Y D H P T L V D L D E A R F I   | - - - - - | 66 |  |
| ArcA-ACP5 | 1  | - - - - -                                                                       | D L L E I L S D L L K -               | I R K E D I D A E T N F E E Y G L D S                       | I L M M K V L N R L E G K Y D N A -                               | V E P S A I V D H P T V G G L A K F L       | - - - - - | 66 |  |
| ArcB-ACP1 | 1  | - - - - -                                                                       | D Y L R E K I G R V I N -             | K P R N E I P V Q L N F M D M G V D S                       | S S M I G A V R E I E K E V G I E -                               | L Y P T L F F E H Q N I A A L S K H F A T   | - - - - - | 69 |  |
| ArcB-ACP2 | 1  | - - - - -                                                                       | T Y L R E K L A R V L G -             | K P K H E V P L T T N F M D L G V E S                       | S S M I G T V Q I E I E K E V G I E -                             | L Y P T L L F F E H Q N I T A L A K H F A E | - - - - - | 69 |  |
| ArcB-ACP3 | 1  | - - - - -                                                                       | L V G C V C D I L K -                 | L K A E D I S P D E E M S A Y G L D S                       | I T L T E T L A N R T S R E L D I E -                             | L A P T I F F E H P T L A S F R D F -       | - - - - - | 64 |  |
| ArcB-ACP4 | 1  | - - - - -                                                                       | T L E H L K K Q L S Q V L K -         | L P S H R I D E K A P L E K Y G L D S                       | L M V M N L S N E L E K V F G P -                                 | L S K T L F F E F Q T L E Q L G S Y F V E   | - - - - - | 70 |  |
| ArcB-ACP5 | 1  | - - - - -                                                                       | L K E K T I E Y L R Q L S Q V L K -   | L P S H R I D E K A P L E K Y G L D S                       | V M V M S L S N E L E K V F G P -                                 | L S K T L F F E F Q T L E Q L G S Y F V     | - - - - - | 73 |  |
| ArcB-ACP6 | 1  | - - - - -                                                                       | S L V M T E L A K V L K -             | I D R S S I D E N E S F Q D Y G L D S                       | I T G T Q L A T R M E K V V G I E -                               | I S P A W L I E F S T I E A L A K K I       | - - - - - | 67 |  |
| ArcC-ACP1 | 1  | - - - - -                                                                       | T L A A M T A E V L R -               | V E P G E I E P E K N L S Y G F D S                         | I T L T G F S N E L S R Q R F R I K                               | L A P S T F L E H P T L G A L V G F L       | - - - - - | 67 |  |
| ArcC-ACP2 | 1  | - - - - -                                                                       | V V G L L A Q V T A -                 | I P R E Q L T G S A V L R E Y G L D S                       | M L T A Q L V D L I D S T L S V R -                               | L E L S D V Q E C Q T V G E L V G R V       | - - - - - | 65 |  |
| ArcF      | 1  | K V T T A R E L R E A L L G C V G Q M L G -                                     | V A P D Q I D E H E S L G V L G L D S | S H K A L R L K A F L E E L L S T S -                       | L P G T L L W H H P S V E A L F R F C A G K L -                   | - - - - -                                   | 80        |    |  |
| ArcH      | 1  | - M T K N E I F E V V K K N I L E V L S D V S A D Q I R V D C Q L K D L G A N S | I D R V E I T T M S M E A L G I N -   | I P L V D L A G V S N I Q G L V D Q L Y E K S S Q S K G S R | - - - - -                                                         | - - - - -                                   | 85        |    |  |



**Figure S12.**  $^{13}\text{C}$  NMR spectra ( $\text{CD}_3\text{OD}$ , 150 MHz) of 1- $^{13}\text{C}$ -labeled archangiumide (A), natural abundance archangiumide (B), and 2- $^{13}\text{C}$ -labeled archangiumide (C). The  $^{13}\text{C}$  enriched positions were labelled in the isotope-labelling groups.

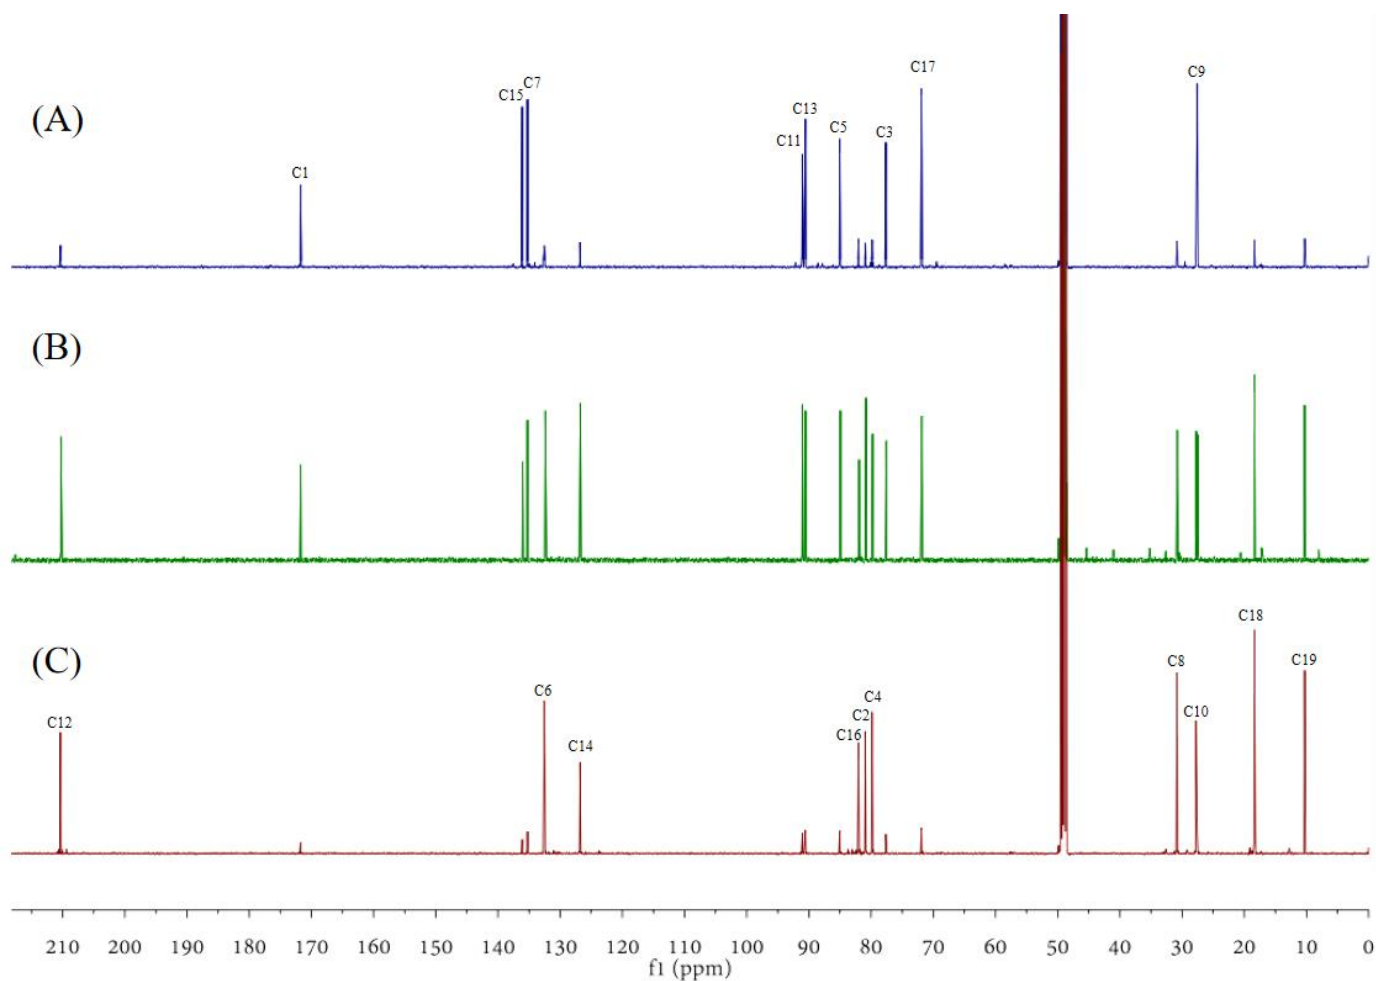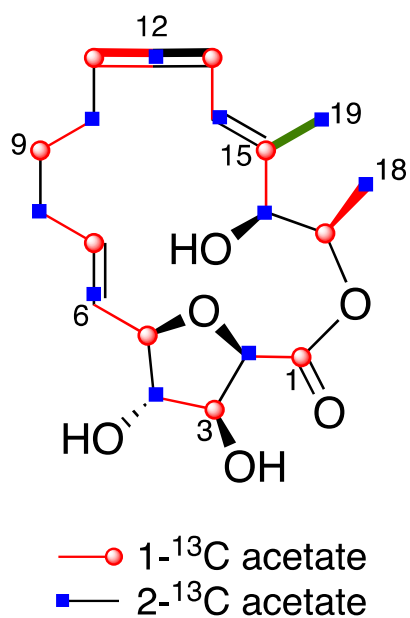



**Figure S13.** LC-MS analysis of SDU8 EtOAc crude extract. The same sample of SDU8 EtOAc crude extract for NMR analysis in Figure S1 was used for LC-MS analysis. Metabolites detection was done on the basis of UV (254 nm) and MS (total ion chromatography, TIC), simultaneously. The extracted ion chromatography (EIC) of  $m/z$  351 presented the peak for archangiumide.

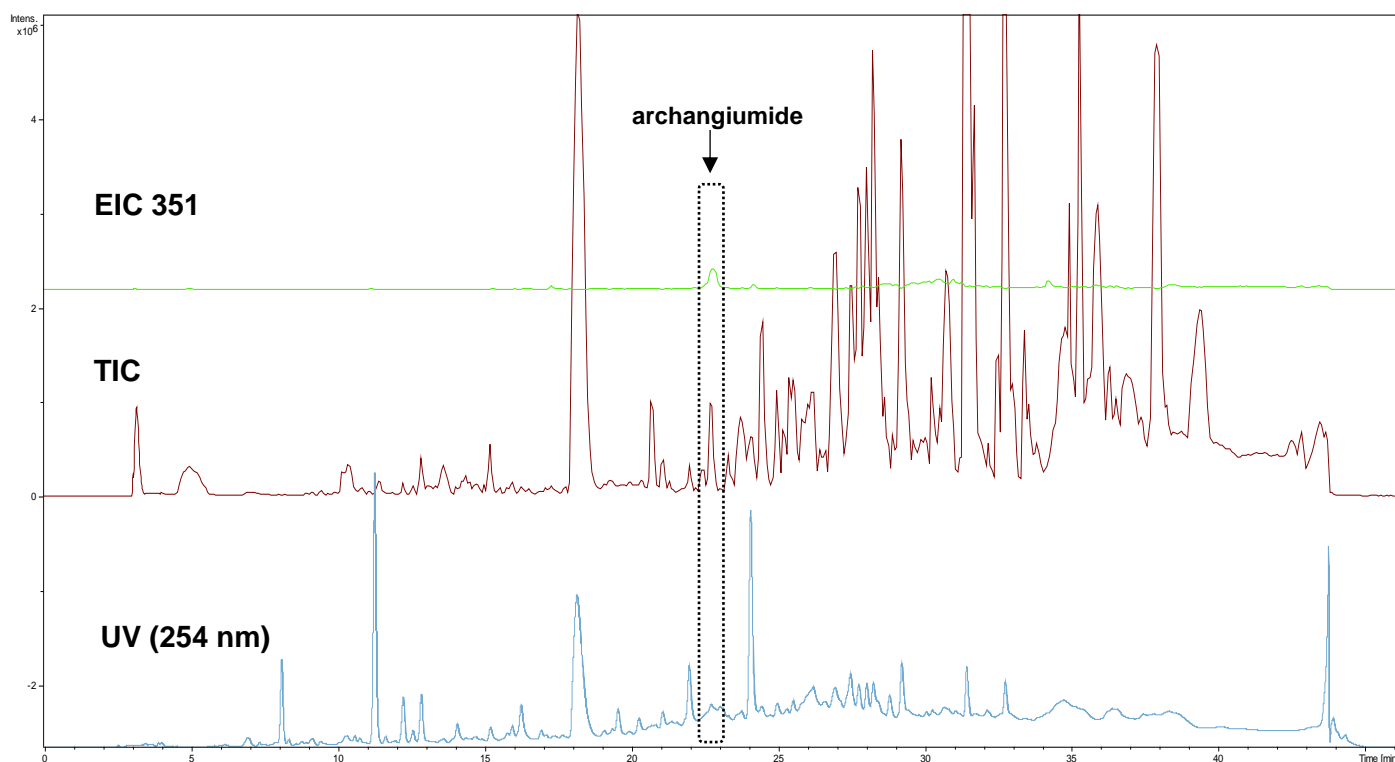

**Figure S14.** The phylogenetic tree constructed based on 16S rRNA gene sequences of myxobacteria. The neighbor-joining method was used. The position of strain SDU8 among related taxa shows it falls into the genus *Archangium*. Bootstrap values based on 1000 replications were listed as percentages at the branching points. The tree was rooted with *Anaeromyxobacter dehalogenans* DSM 21875 as the outgroup, and the NCBI accession number of each sequence was added in the parentheses.

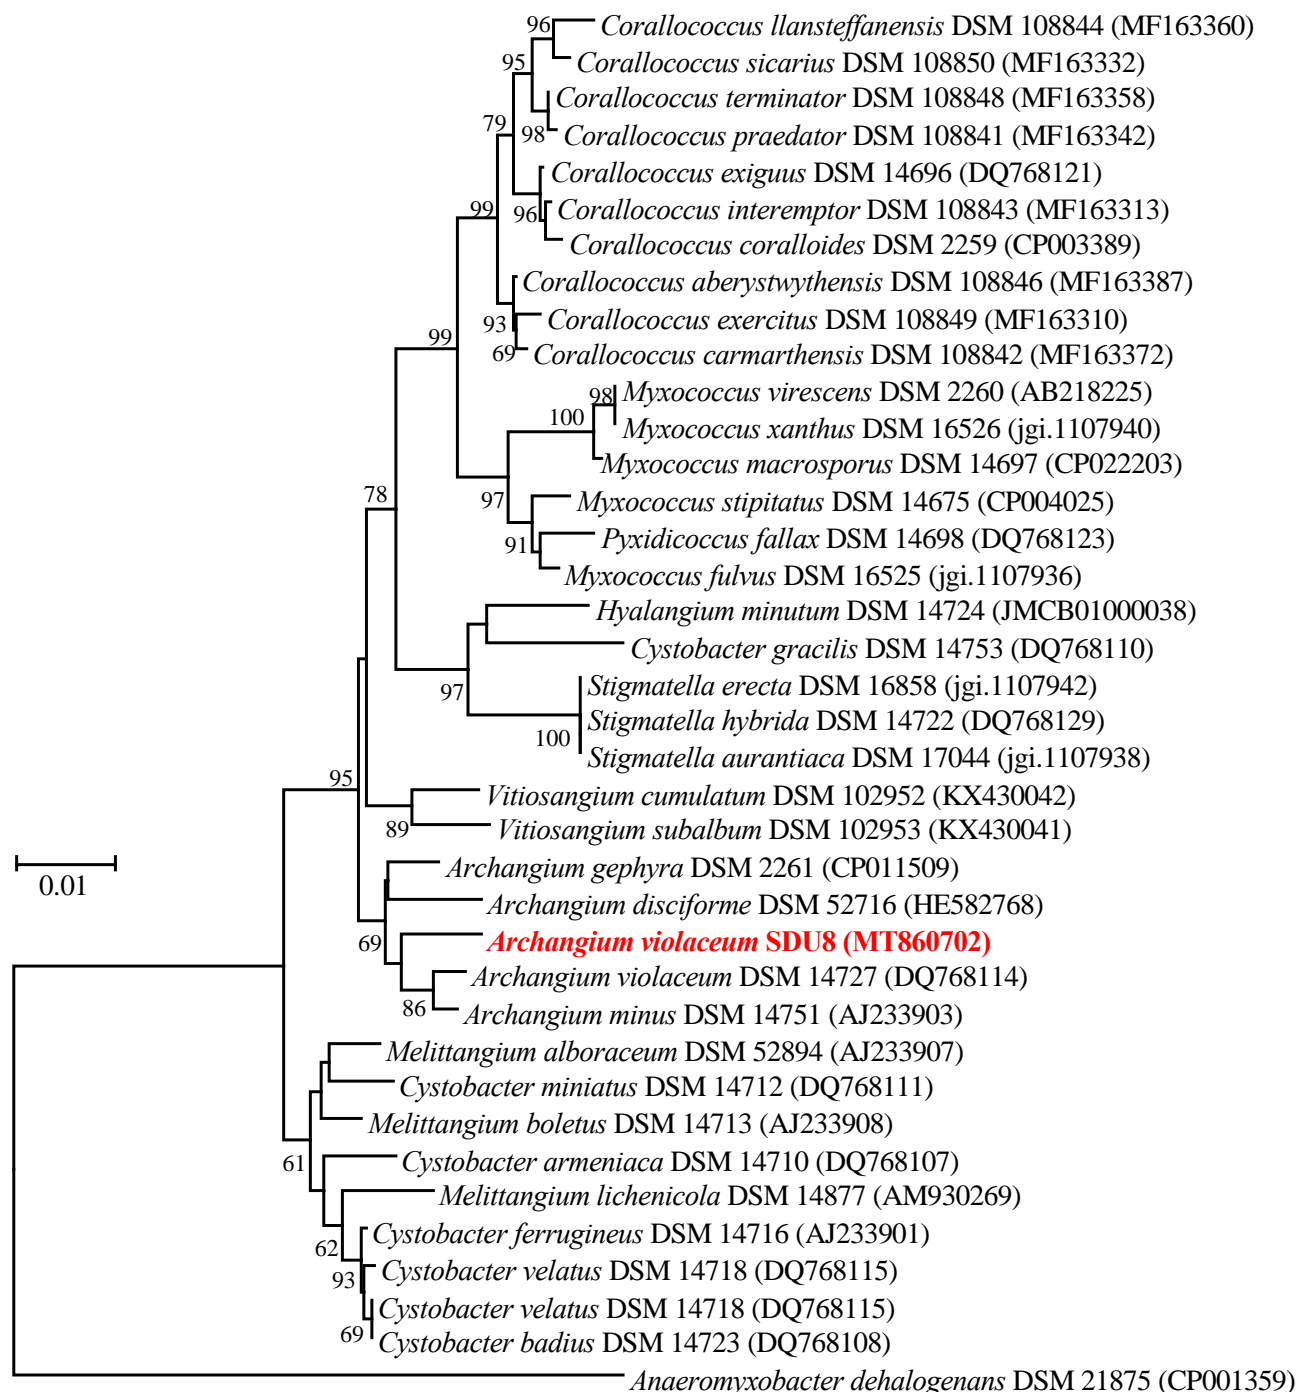

**Figure S15.**  $^1\text{H}$  NMR (500 MHz,  $\text{DMSO-}d_6$ ) of archangiumide (**1**).

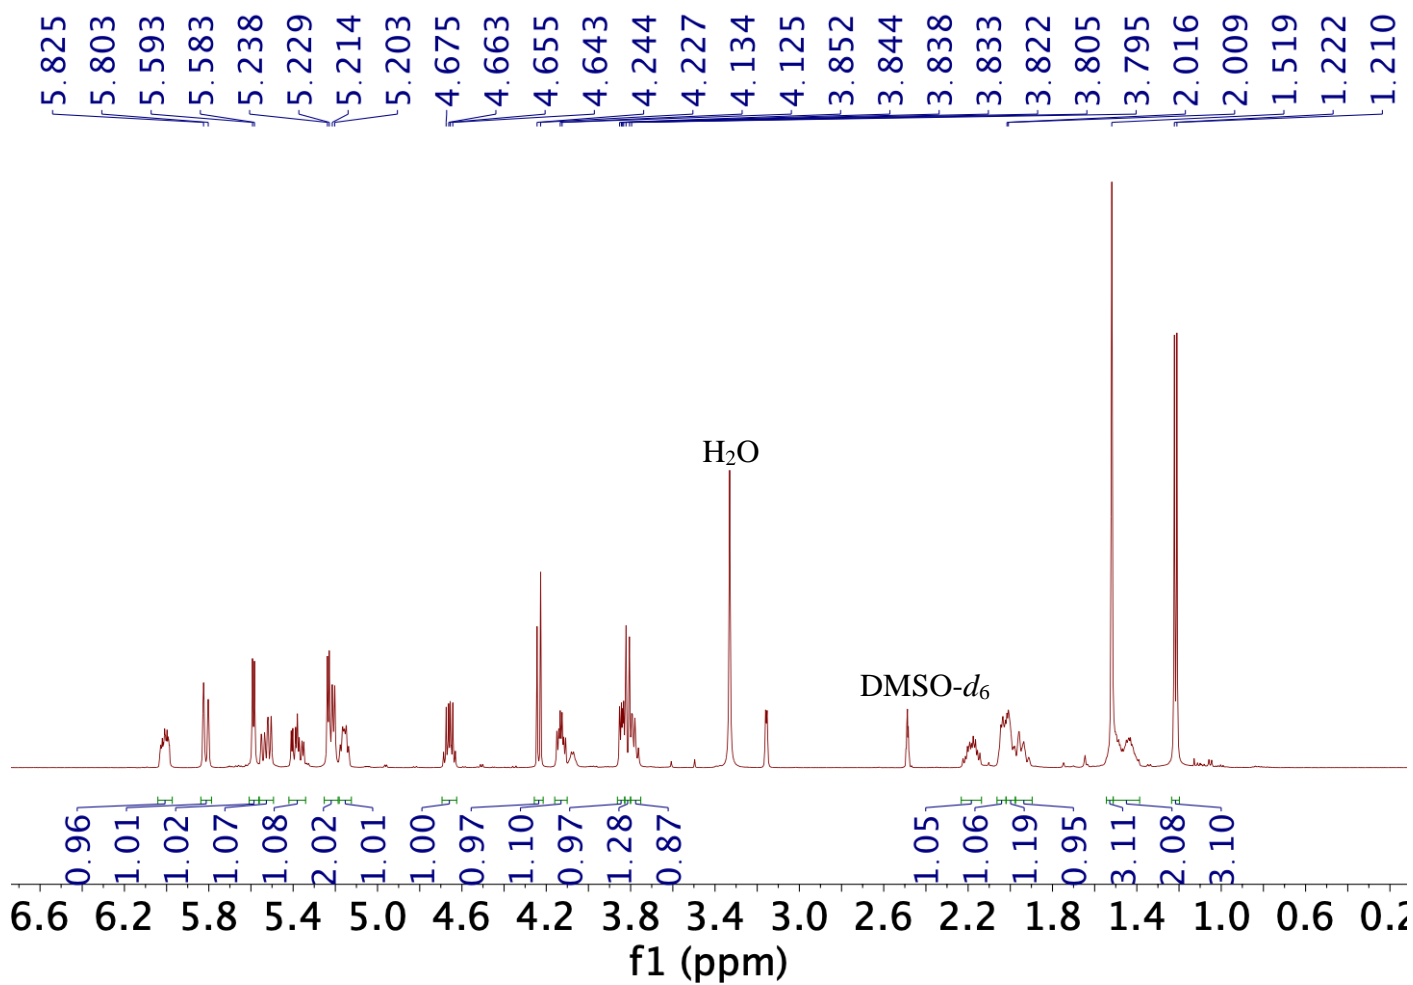

**Figure S16.**  $^{13}\text{C}$  NMR (125 MHz,  $\text{DMSO}-d_6$ ) spectrum of archangiumide (**1**).

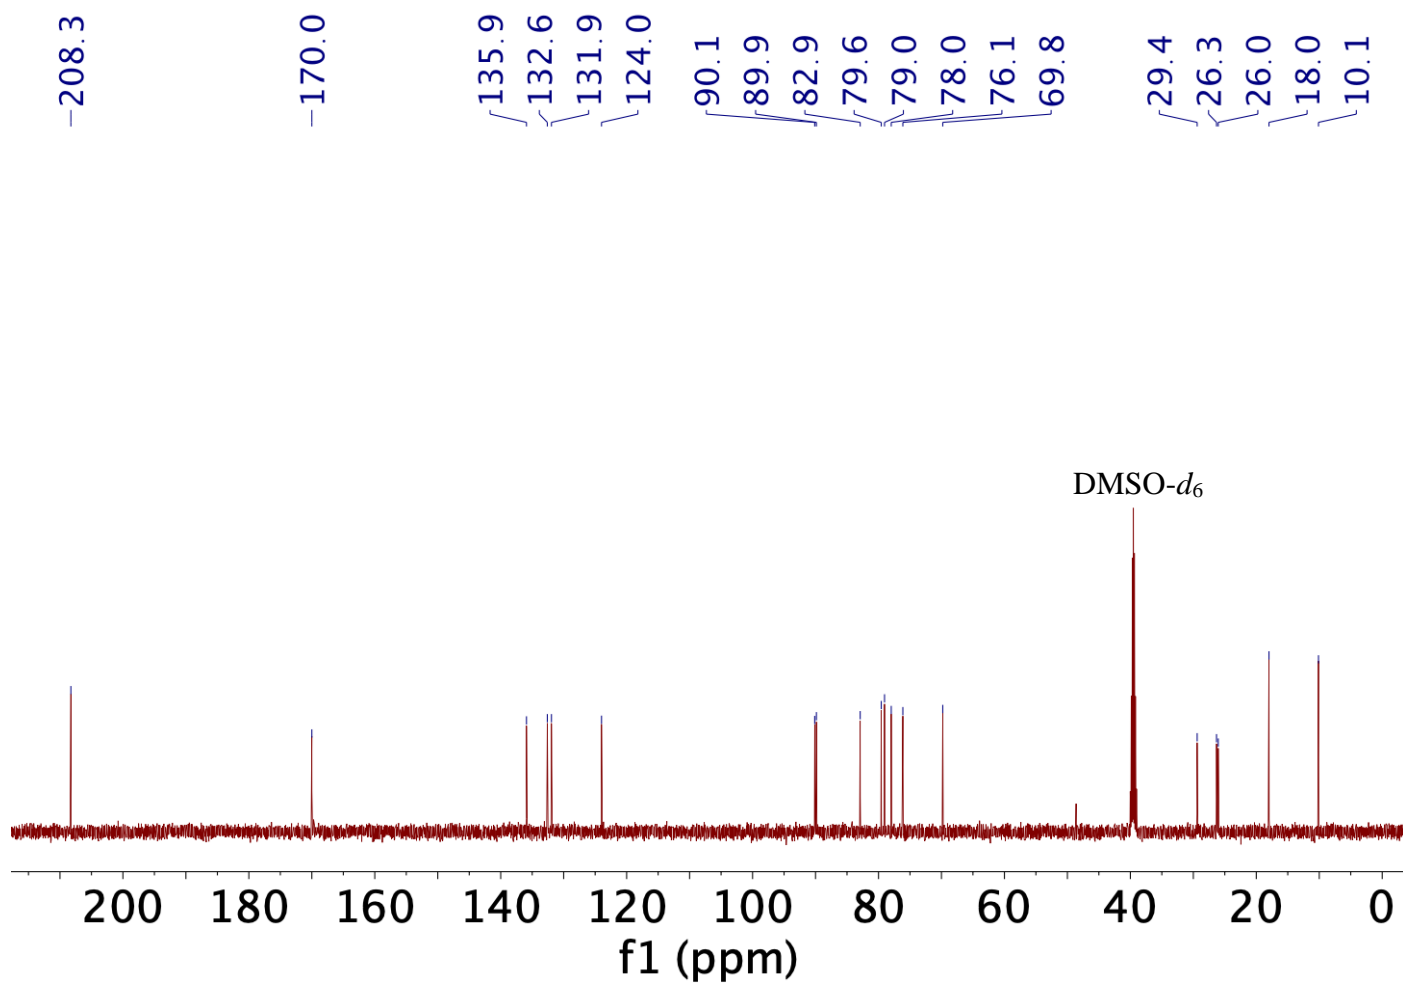

**Figure S17.**  $^1\text{H}$ - $^{13}\text{C}$  HSQC (500 MHz,  $\text{DMSO-}d_6$ ) spectrum of archangiumide (**1**).

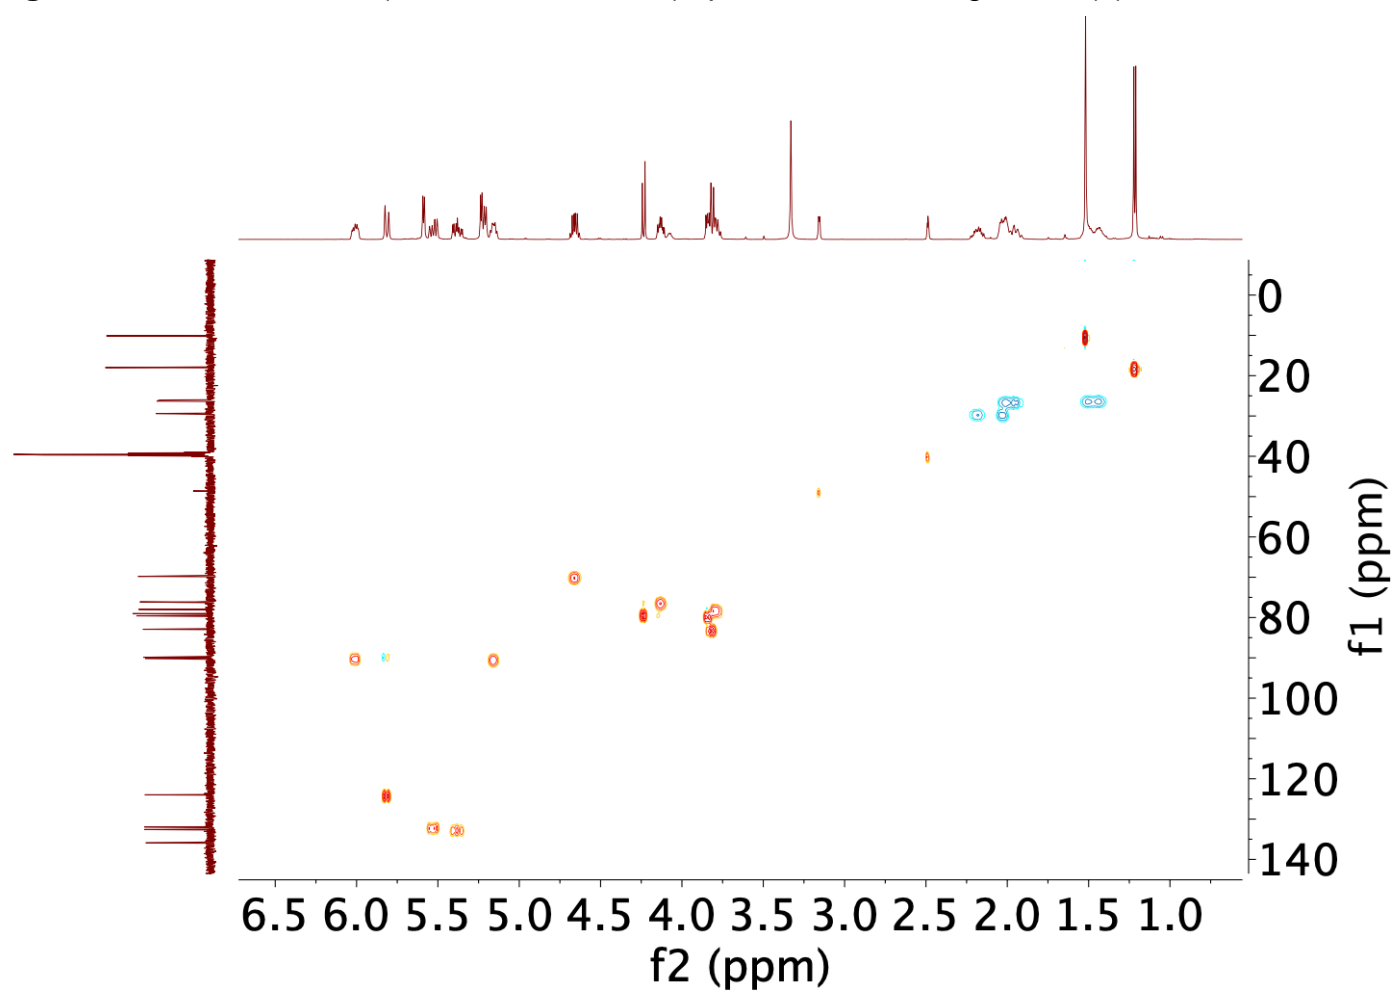

**Figure S18.**  $^1\text{H}$ - $^{13}\text{C}$  HMBC NMR (500 MHz,  $\text{DMSO}-d_6$ ) spectrum of archangiumide (**1**).

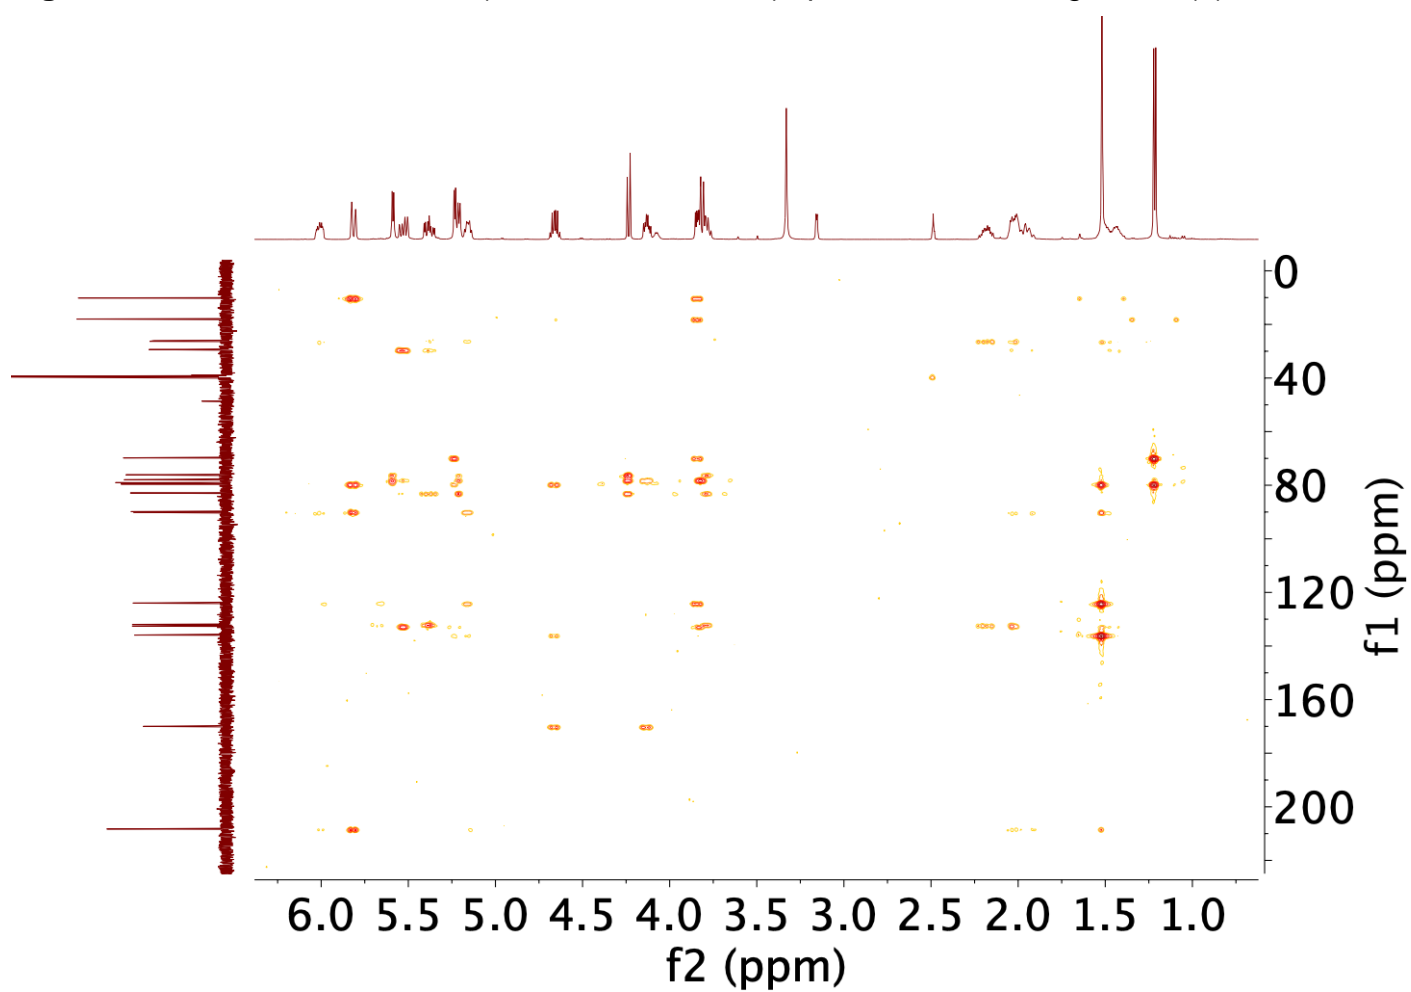

**Figure S19.**  $^1\text{H}$ - $^1\text{H}$  COSY NMR (500 MHz,  $\text{DMSO}-d_6$ ) spectrum of archangiumide (**1**).

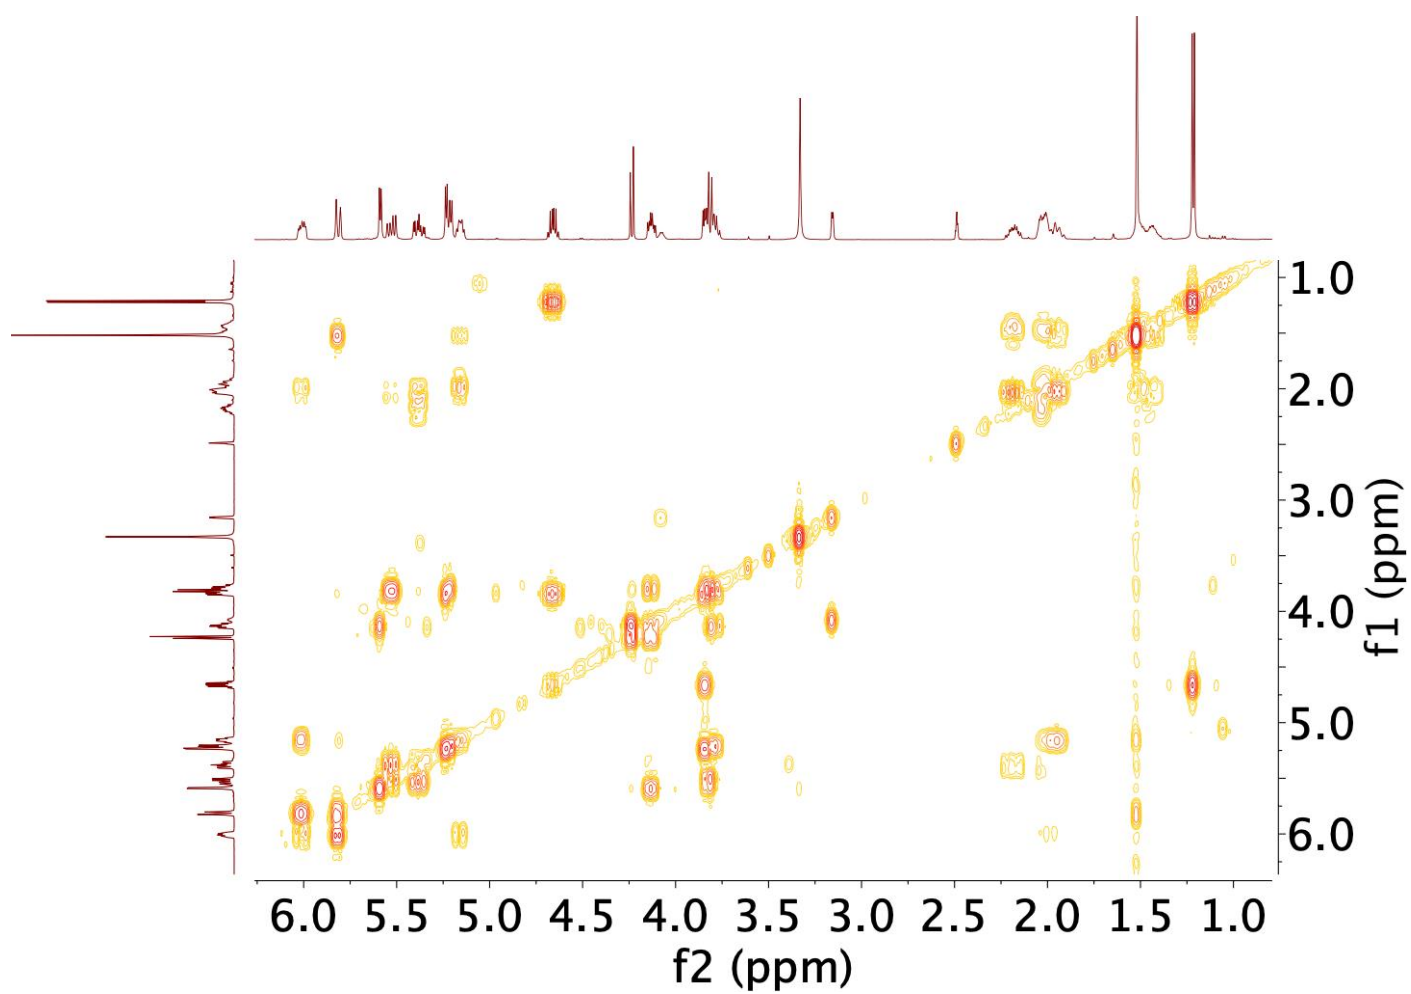

**Figure S20.**  $^1\text{H}$ - $^1\text{H}$  NOESY NMR (600 MHz,  $\text{CD}_3\text{OD}$ ) spectrum of archangiumide (**1**).

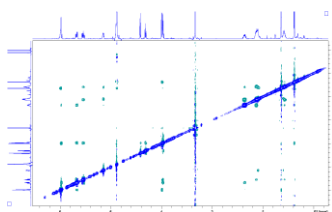

**Figure S21.** High-resolution mass spectrum of archangiumide

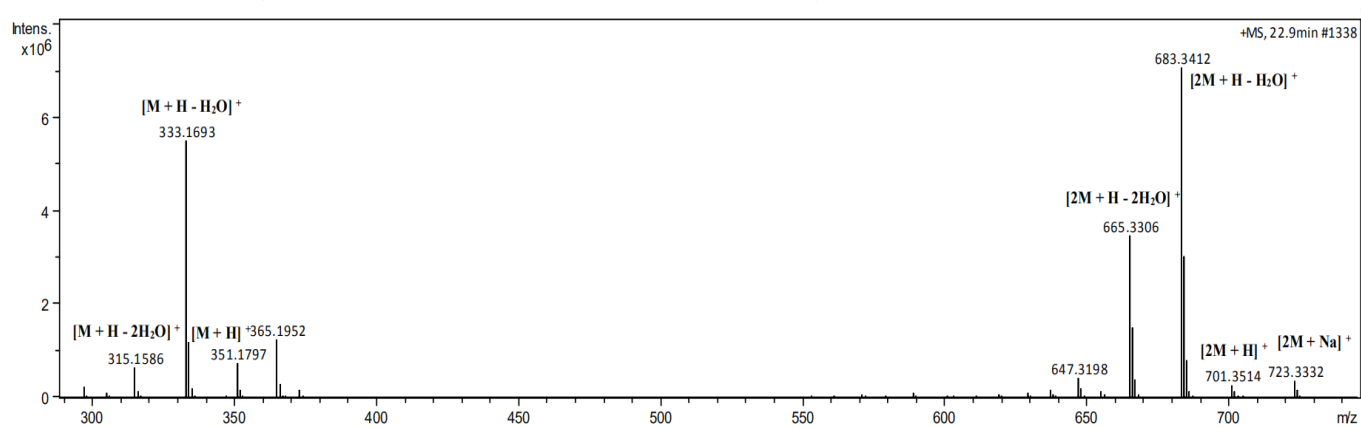



Figure S22. IR spectrum of archangiumide

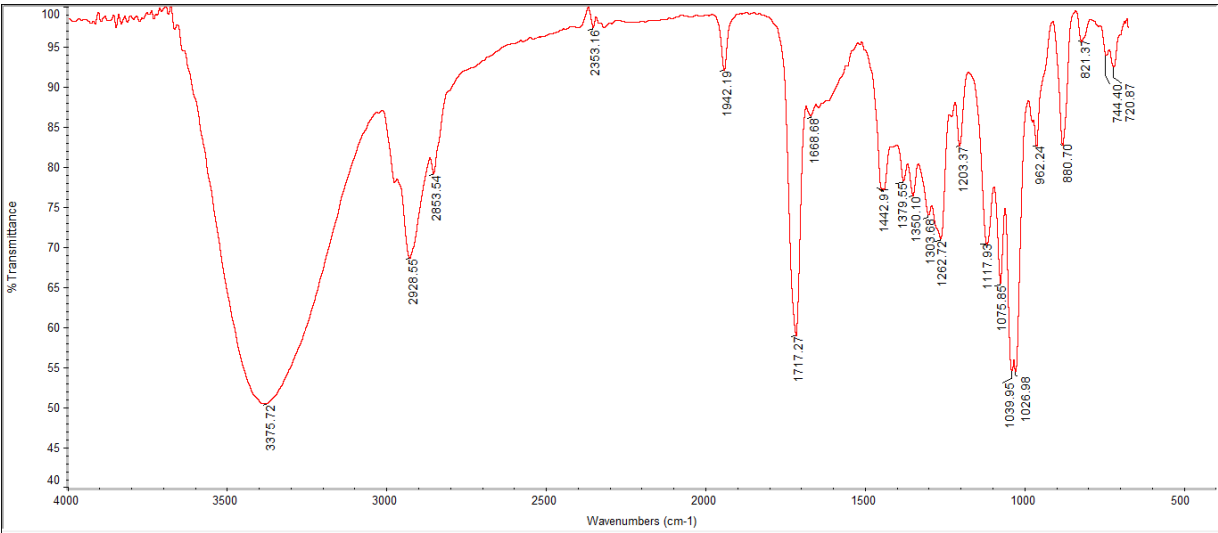

Figure S23. UV spectrum of archangiumide

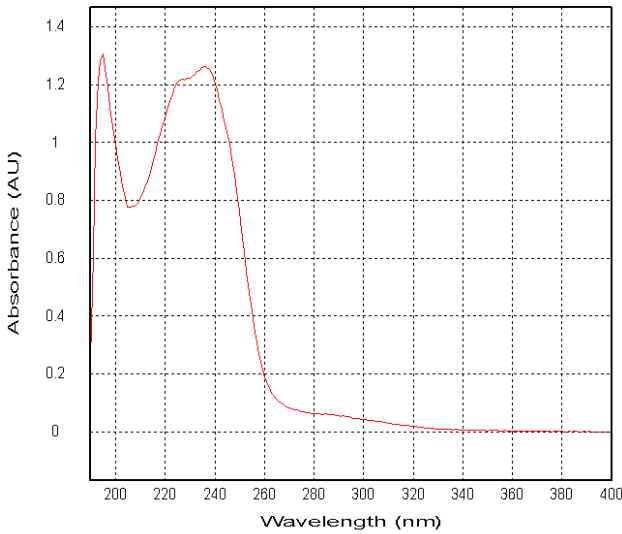



## References

- (1) Reichenbach, H.; Dworkin, M. *The Prokaryotes*, 2nd ed.; Balows, A., Trüper, H. G., Dworkin, M., Harder, W., Schleifer, K.-H., Eds.; Springer-Verlag New York: New York, **1992**. <https://doi.org/10.1007/978-1-4757-2191-1>.
- (2) Wu, C.; Van Wezel, G. P.; Hae Choi, Y. Identification of Novel Endophenaside Antibiotics Produced by *Kitasatospora* Sp. MBT66. *J. Antibiot. (Tokyo)*. **2015**, *68* (7), 445–452. <https://doi.org/10.1038/ja.2015.14>.
- (3) DeGraff, W. G.; Mitchell, J. B. Evaluation of a Tetrazolium-Based Semiautomated Colorimetric Assay: Assessment of Chemosensitivity Testing. *Cancer Res.* **1987**, *47* (4), 936–942.
- (4) Hichri, F.; Omri Hichri, A.; Maha, M.; Saad Mana Hossan, A.; Flamini, G.; Ben Jannet, H. Chemical Composition, Antibacterial, Antioxidant and in Vitro Antidiabetic Activities of Essential Oils from *Eruca Vesicaria*. *Chem. Biodivers.* **2019**, *16* (8). <https://doi.org/10.1002/cbdv.201900183>.
- (5) Schneider, T. R.; Sheldrick, G. M. Substructure Solution with SHELXD. *Acta Crystallogr. Sect. D Biol. Crystallogr.* **2002**, *58* (10), 1772–1779. <https://doi.org/10.1107/S0907444902011678>.
- (6) Reher, R.; Kim, H. W.; Zhang, C.; Mao, H. H.; Wang, M.; Nothias, L. F.; Caraballo-Rodriguez, A. M.; Glukhov, E.; Teke, B.; Leao, T.; Alexander, K. L.; Duggan, B. M.; Van Everbroeck, E. L.; Dorrestein, P. C.; Cottrell, G. W.; Gerwick, W. H. A Convolutional Neural Network-Based Approach for the Rapid Annotation of Molecularly Diverse Natural Products. *J. Am. Chem. Soc.* **2020**, *142* (9), 4114–4120. <https://doi.org/10.1021/jacs.9b13786>.
- (7) Moon, K.; Cui, J.; Kim, E.; Riandi, E. S.; Park, S. H.; Byun, W. S.; Kal, Y.; Park, J. Y.; Hwang, S.; Shin, D.; Sun, J.; Oh, K. B.; Cha, S.; Shin, J.; Lee, S. K.; Yoon, Y. J.; Oh, D. C. Structures and Biosynthetic Pathway of Pulvomycins B-D: 22-Membered Macrolides from an Estuarine *Streptomyces* Sp. *Org. Lett.* **2020**, *22* (14), 5358–5362. <https://doi.org/10.1021/acs.orglett.0c01249>.
